# Supplementary material for: Neogrisphenol A, a Potential Ovarian Cancer Inhibitor from a New Record Fungus Neohelicosporium griseum
Source: MDPI journal article supplement (doi:10.3390/metabo13030435), 2023-03-16
Supplement: s1 [file s1]

---

## *Supplementary Material*

# **Neogrisphenol A, a Potential Ovarian Cancer Inhibitor from a New Record Fungus *Neohelicosporium griseum***

**Li-Juan Zhang** <sup>1,2,3,†</sup>, **Ming-Fei Yang** <sup>4,5,6,†</sup>, **Jian Ma** <sup>2,3</sup>, **Xing-Juan Xiao** <sup>1</sup>, **Xiao-Yan Ma** <sup>1</sup>, **De-Ge Zheng** <sup>1</sup>, **Mei-Yan Han** <sup>1</sup>, **Ming-Lei Xia** <sup>1</sup>, **Ruvishika S. Jayawardena** <sup>2,3</sup>, **Ausana Mapook** <sup>2</sup>, **Yuan-Pin Xiao** <sup>1</sup>, **Ji-Chuan Kang** <sup>4,\*</sup> and **Yong-Zhong Lu** <sup>1,4,\*</sup>

<sup>1</sup> School of Food and Pharmaceutical Engineering, Guizhou Institute of Technology, Guiyang 550003, China; 6471105010@lamduan.mfu.ac.th (L.-J.Z.); xiaoxingjuanbenjuan@gmail.com (X.-J.X.);

20120065@git.edu.cn (X.-Y.M.); degezheng@gmail.com (D.-G.Z.);

meiyanhan04@gmail.com (M.-Y.H.); xml0312xml@gmail.com (M.-L.X.);

emaypx@gmail.com (Y.-P.X.)

<sup>2</sup> Center of Excellence in Fungal Research, Mae Fah Luang University, Chiang Rai 57100, Thailand; 6371105007mj@gmail.com (J.M.);

ruvishika.jay@mfu.ac.th (R.S.J.); Phung.ausana@gmail.com (A.M.)

<sup>3</sup> School of Science, Mae Fah Luang University, Chiang Rai 57100, Thailand

<sup>4</sup> Engineering and Research Center for Southwest Bio-Pharmaceutical Resources of National Education

Ministry of China, Guizhou University, Guiyang 550025, China;

mf\_yang@126.com

<sup>5</sup> College of Life Sciences, Guizhou University, Guiyang 550025, China

<sup>6</sup> Department of Health Management, Guiyang Healthcare Vocational University, Guiyang 550081, China

\* Correspondence: jckang@gzu.edu.cn (J.-C.K.); yzlu@git.edu.cn (Y.-Z.L.); Tel.: +86-058188210723 (Y.-Z.L.)

† These authors equally contributed to this work.

| No.         | Contents                                                                               | Pages |
|-------------|----------------------------------------------------------------------------------------|-------|
| Figure S1.  | <sup>1</sup> H NMR spectrum of compound <b>1</b> (600 MHz, DMSO).....                  | 3     |
| Figure S2.  | <sup>13</sup> C NMR spectrum of compound <b>1</b> (150 MHz, DMSO).....                 | 3     |
| Figure S3.  | <sup>1</sup> H- <sup>1</sup> H COSY spectrum of compound <b>1</b> (DMSO).....          | 4     |
| Figure S4.  | HSQC spectrum of compound <b>1</b> (DMSO).....                                         | 4     |
| Figure S5.  | HMBC spectrum of compound <b>1</b> (DMSO).....                                         | 5     |
| Figure S6.  | NOESY spectrum of compound <b>1</b> (DMSO).....                                        | 5     |
| Figure S7.  | ESIMS of compound <b>1</b> .....                                                       | 6     |
| Figure S8.  | HR-ESIMS of compound <b>1</b> .....                                                    | 7     |
| Figure S9.  | IR (KBr) spectrum of compound <b>1</b> .....                                           | 8     |
| Figure S10. | <sup>1</sup> H NMR spectrum of compound <b>2</b> (600 MHz, DMSO).....                  | 9     |
| Figure S11. | <sup>13</sup> C NMR spectrum of compound <b>2</b> (150 MHz, DMSO).....                 | 9     |
| Figure S12. | <sup>1</sup> H- <sup>1</sup> H COSY spectrum of compound <b>2</b> (DMSO).....          | 10    |
| Figure S13. | HSQC spectrum of compound <b>2</b> (DMSO).....                                         | 10    |
| Figure S14. | HMBC spectrum of compound <b>2</b> (DMSO).....                                         | 11    |
| Figure S15. | NOESY spectrum of compound <b>2</b> (DMSO).....                                        | 11    |
| Figure S16. | ESIMS of compound <b>2</b> .....                                                       | 12    |
| Figure S17. | HR-ESIMS of compound <b>2</b> .....                                                    | 13    |
| Figure S18. | IR (KBr) spectrum of compound <b>2</b> .....                                           | 14    |
| Figure S19. | <sup>1</sup> H NMR spectrum of compound <b>3</b> (600 MHz, DMSO).....                  | 15    |
| Figure S20. | <sup>13</sup> C NMR spectrum of compound <b>3</b> (150 MHz, DMSO).....                 | 15    |
| Figure S21. | <sup>1</sup> H- <sup>1</sup> H COSY spectrum of compound <b>3</b> (DMSO).....          | 16    |
| Figure S22. | HSQC spectrum of compound <b>3</b> (DMSO).....                                         | 16    |
| Figure S23. | HMBC spectrum of compound <b>3</b> (DMSO).....                                         | 17    |
| Figure S24. | ESIMS of compound <b>3</b> .....                                                       | 18    |
| Figure S25. | HR-ESIMS of compound <b>3</b> .....                                                    | 19    |
| Figure S26. | IR (KBr) spectrum of compound <b>3</b> .....                                           | 20    |
| Figure S27. | <sup>1</sup> H NMR spectrum of compound <b>4</b> (600 MHz, DMSO).....                  | 21    |
| Figure S28. | <sup>13</sup> C NMR spectrum of compound <b>4</b> (150 MHz, DMSO).....                 | 21    |
| Figure S29. | <sup>1</sup> H- <sup>1</sup> H COSY spectrum of compound <b>4</b> (DMSO).....          | 22    |
| Figure S30. | HSQC spectrum of compound <b>4</b> (DMSO).....                                         | 22    |
| Figure S31. | HMBC spectrum of compound <b>4</b> (DMSO).....                                         | 23    |
| Figure S32. | ESIMS of compound <b>4</b> .....                                                       | 24    |
| Figure S33. | <sup>1</sup> H NMR spectrum of compound <b>5</b> (600 MHz, DMSO).....                  | 25    |
| Figure S34. | <sup>13</sup> C NMR spectrum of compound <b>5</b> (150 MHz, DMSO).....                 | 25    |
| Figure S35. | ESIMS of compound <b>5</b> .....                                                       | 26    |
| Figure S36. | <sup>1</sup> H NMR spectrum of compound <b>6</b> (600 MHz, DMSO).....                  | 27    |
| Figure S37. | <sup>13</sup> C NMR spectrum of compound <b>6</b> (150 MHz, DMSO).....                 | 27    |
| Figure S38. | ESIMS of compound <b>6</b> .....                                                       | 28    |
| Figure S39. | <sup>1</sup> H NMR spectrum of compound <b>7</b> (600 MHz, CDCl <sub>3</sub> ).....    | 29    |
| Figure S40. | <sup>13</sup> C NMR spectrum of compound <b>7</b> (150 MHz, CDCl <sub>3</sub> ).....   | 29    |
| Figure S41. | Optimized geometries of isomers of <b>1</b> and <b>2</b> at B3LYP/6-31G(d) level.....  | 30    |
| Table. S1.  | Optimized cartesian coordinates of conformers of <b>1</b> at B3LYP/6-31G(d) level..... | 31    |
| Table S2.   | The results of the DP4 <sup>+</sup> analysis of <b>1</b> .....                         | 32    |
| Table. S3.  | Optimized cartesian coordinates of conformers of <b>2</b> at B3LYP/6-31G(d) level..... | 33    |
| Table S4.   | The results of the DP4 <sup>+</sup> analysis of <b>2</b> .....                         | 34    |

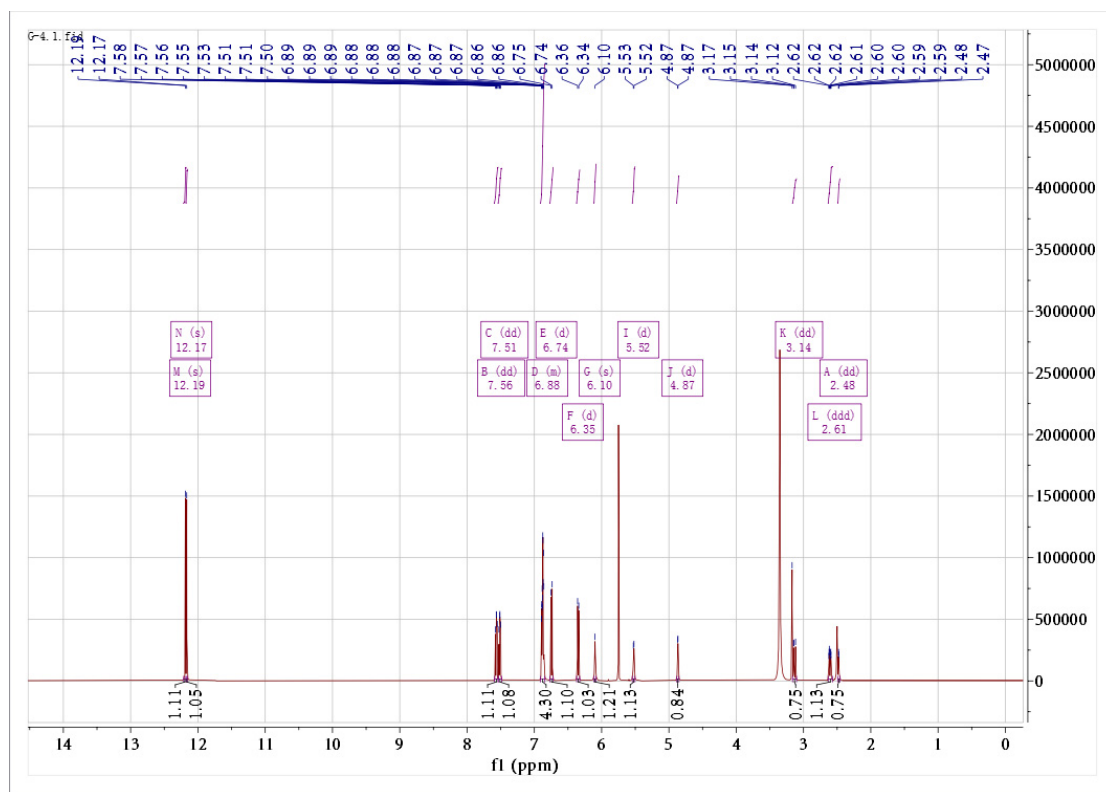

Figure S1.  $^1\text{H}$  NMR spectrum of compound **1** (600 MHz, DMSO)

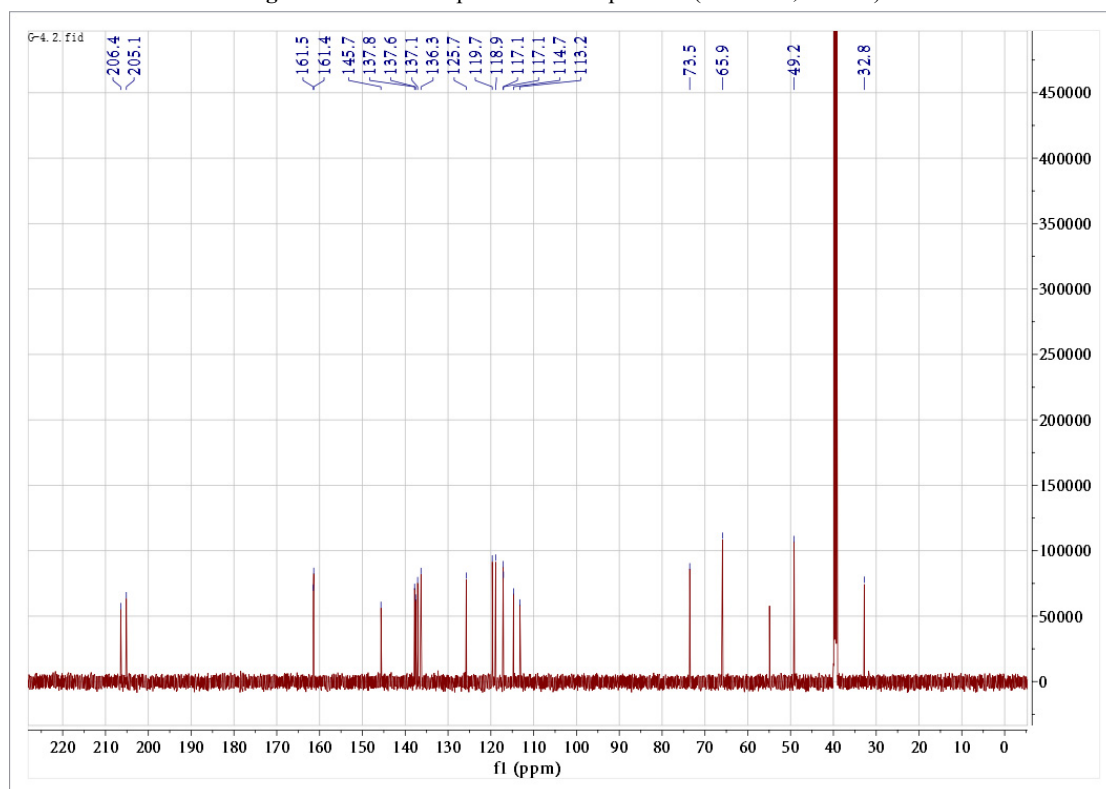

Figure S2.  $^{13}\text{C}$  NMR spectrum of compound **1** (150 MHz, DMSO)

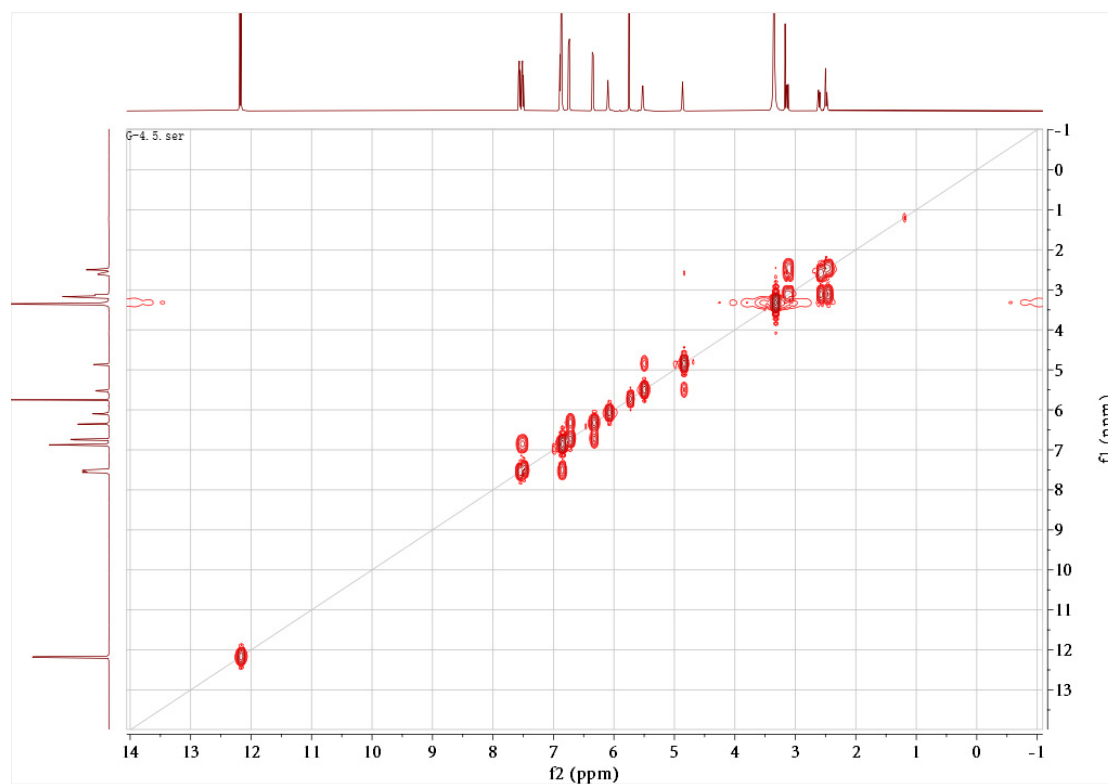

**Figure S3.**  $^1\text{H}$ - $^1\text{H}$  COSY spectrum of compound 1 (DMSO)

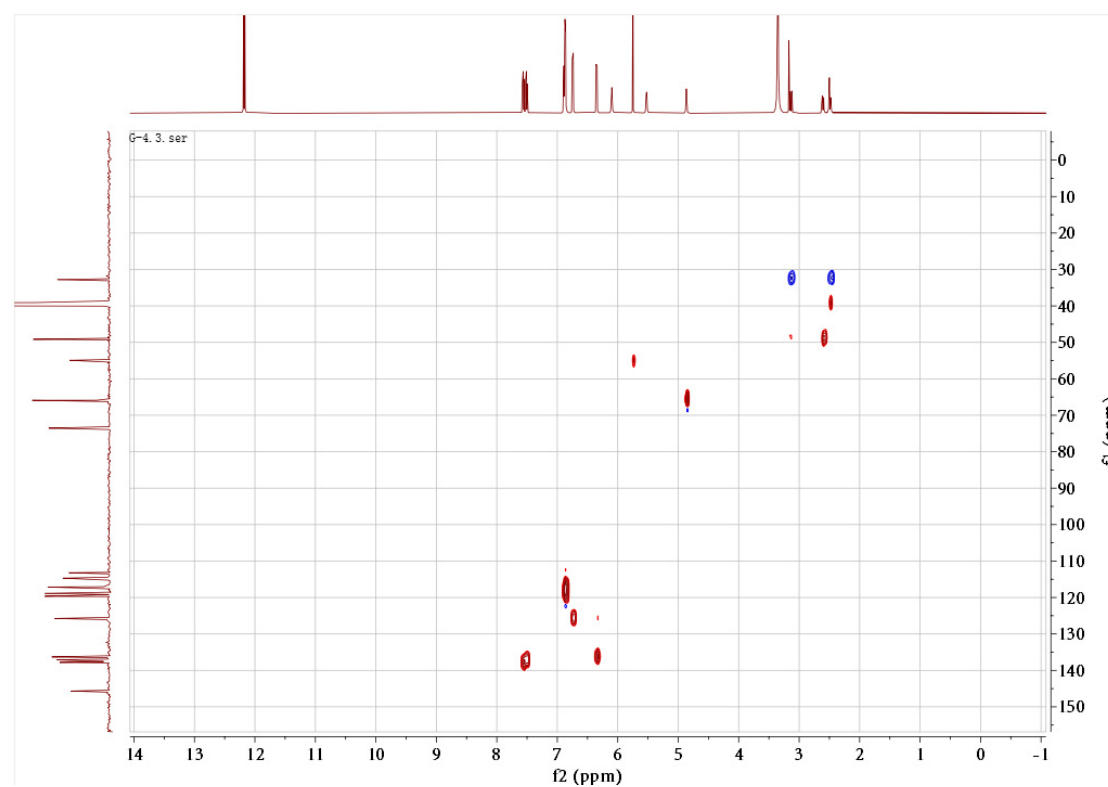

**Figure S4.** HSQC spectrum of compound 1 (DMSO)

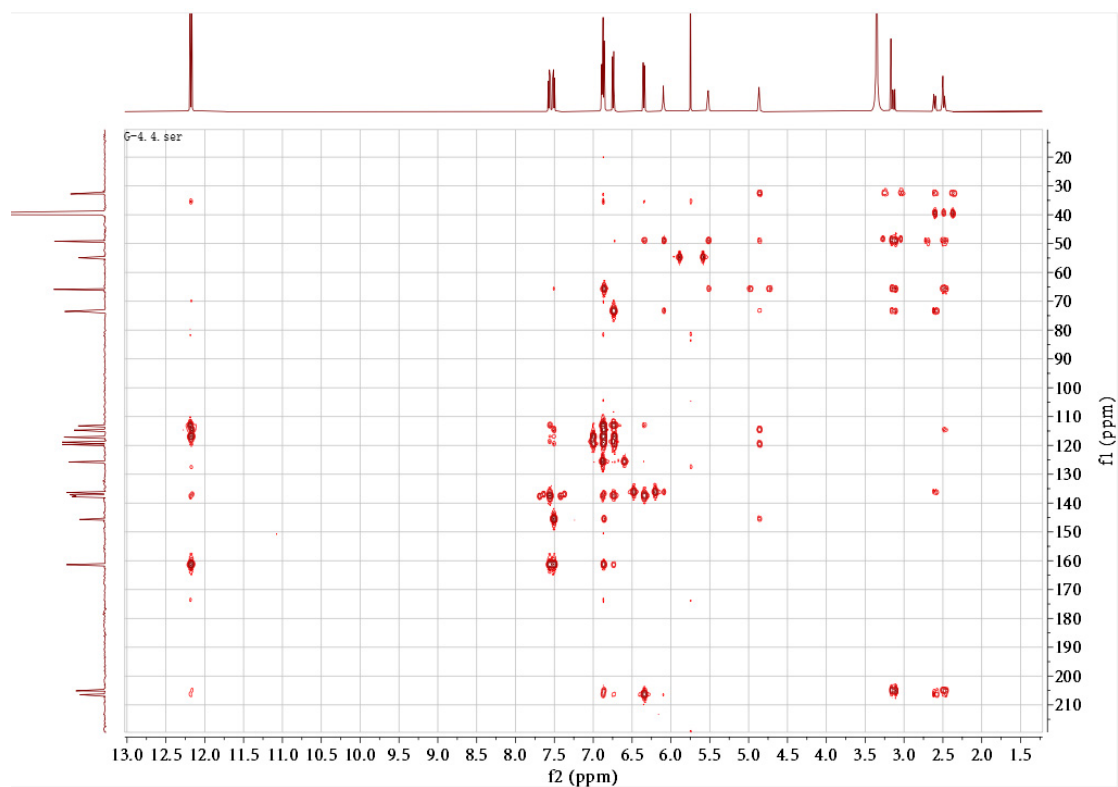

**Figure S5.** HMBC spectrum of compound **1** (DMSO)

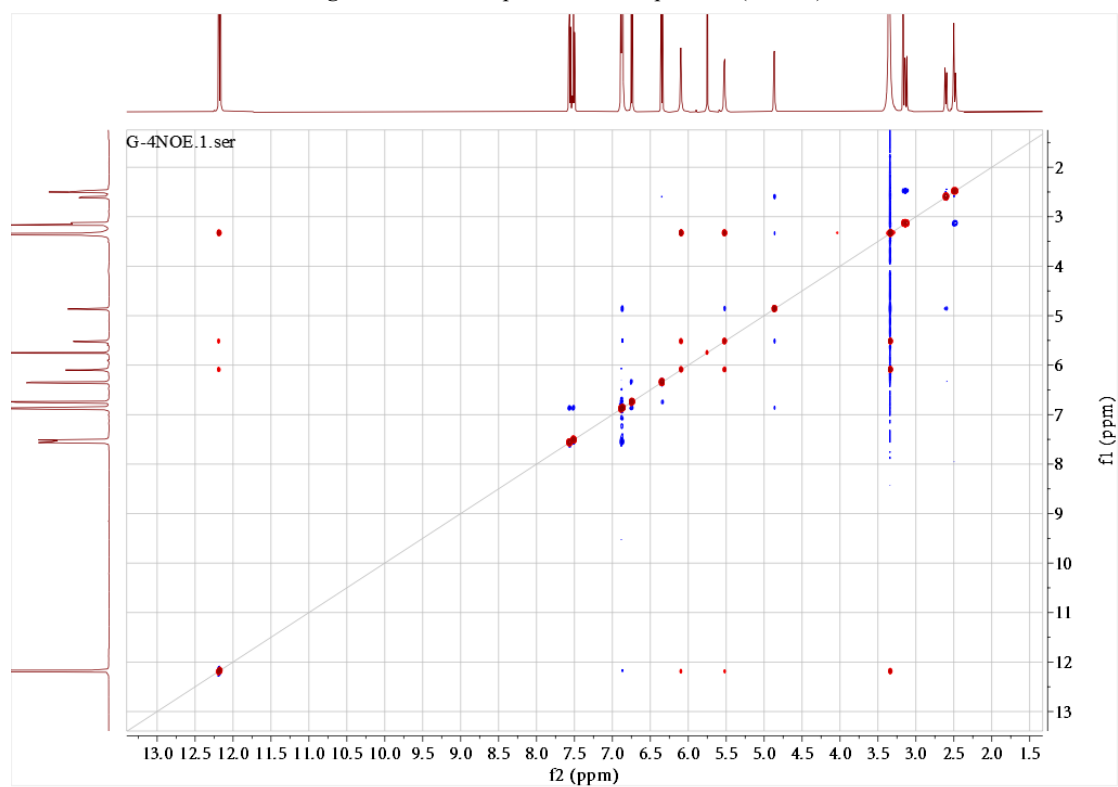

**Figure S6.** NOESY spectrum of compound **1** (DMSO)

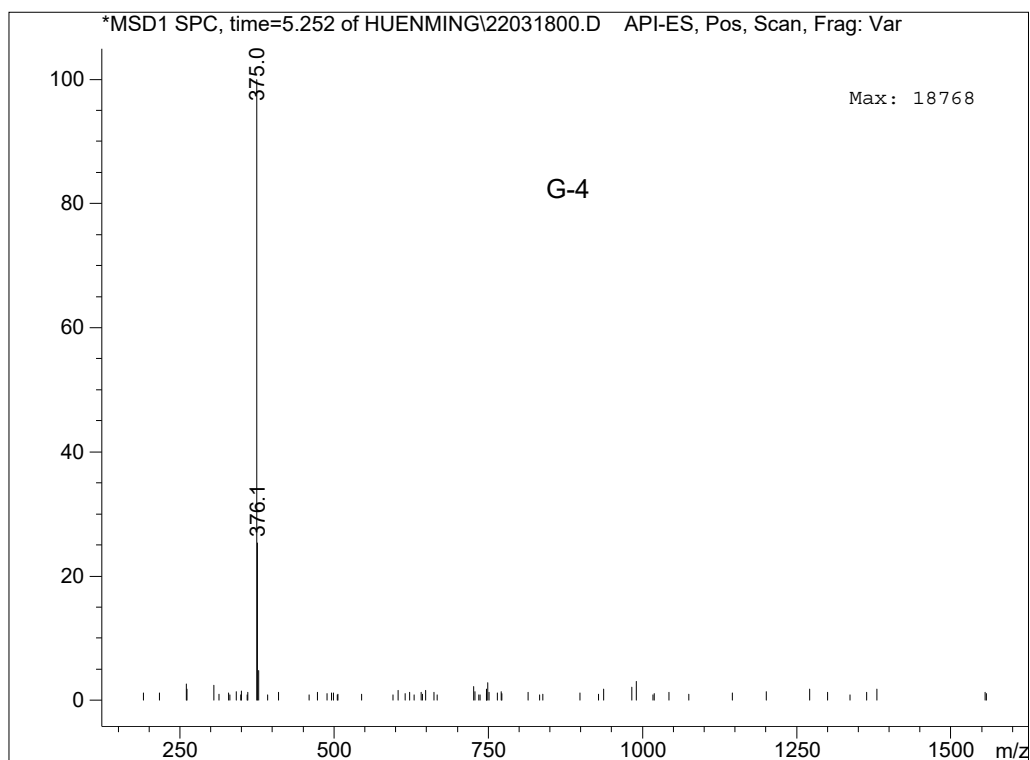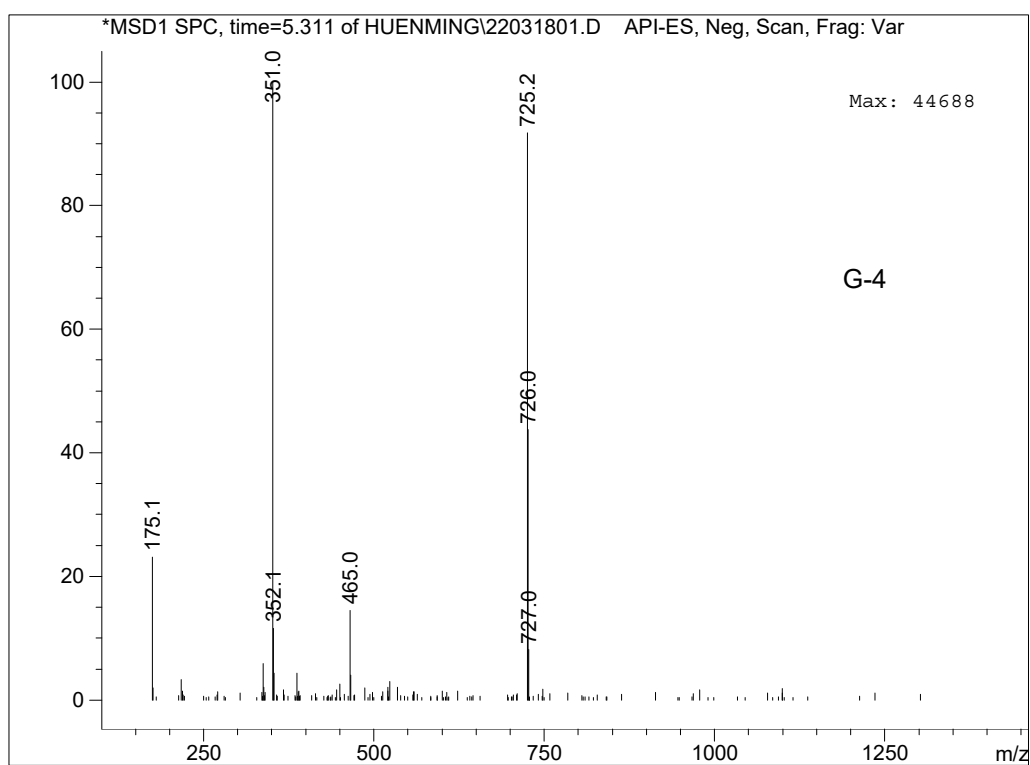

**Figure S7.** ESIMS of compound **1**

Item name: G-4  
Item description:

Channel name: 1: Average Time 0.1217 min : TOF MS (50-1500) ESI+ : Centroided : Combined

6.55e7

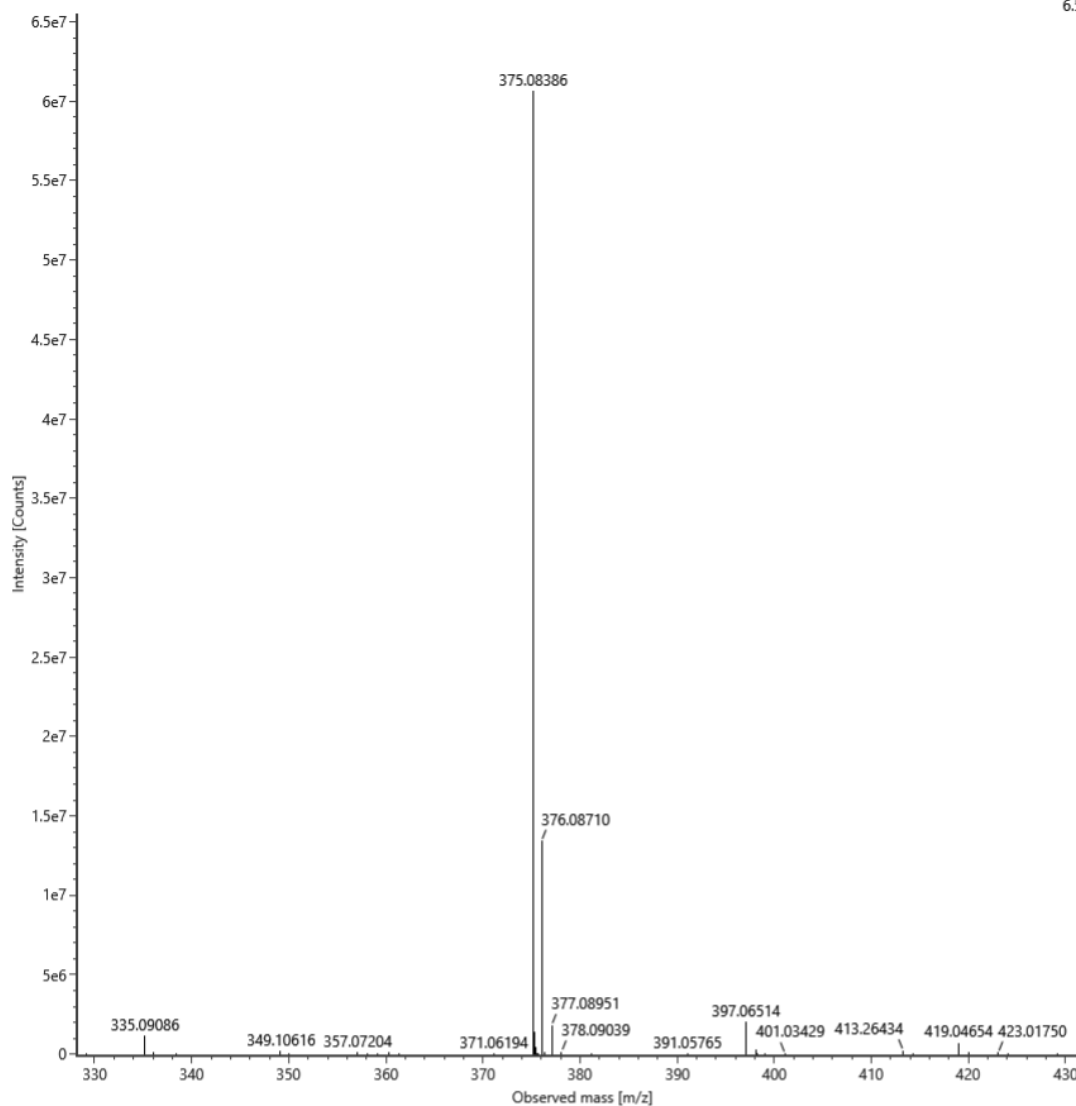

Add:Na<sup>+</sup>

**Composition i-FIT Confidence (%) Predicted m/z m/z error (PPM)**

| Composition                                       | i-FIT Confidence (%) | Predicted m/z | m/z error (PPM) |
|---------------------------------------------------|----------------------|---------------|-----------------|
| C <sub>20</sub> H <sub>16</sub> O <sub>6</sub> Na | 100.000000           | 375.083909    | -0.131856       |

**Figure S8.** HR-ESIMS of compound **1**

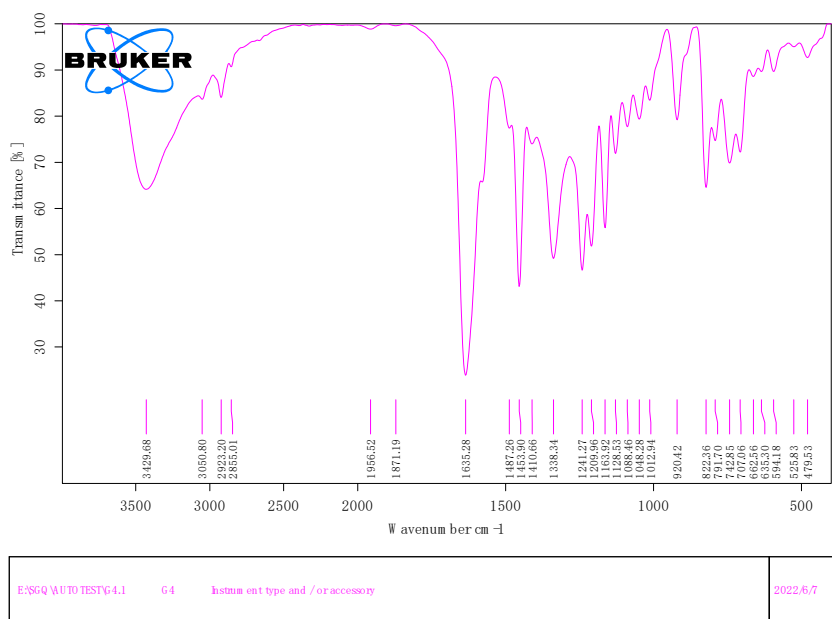

Page 1/1

**Figure S9.** IR (KBr) spectrum of compound **1**



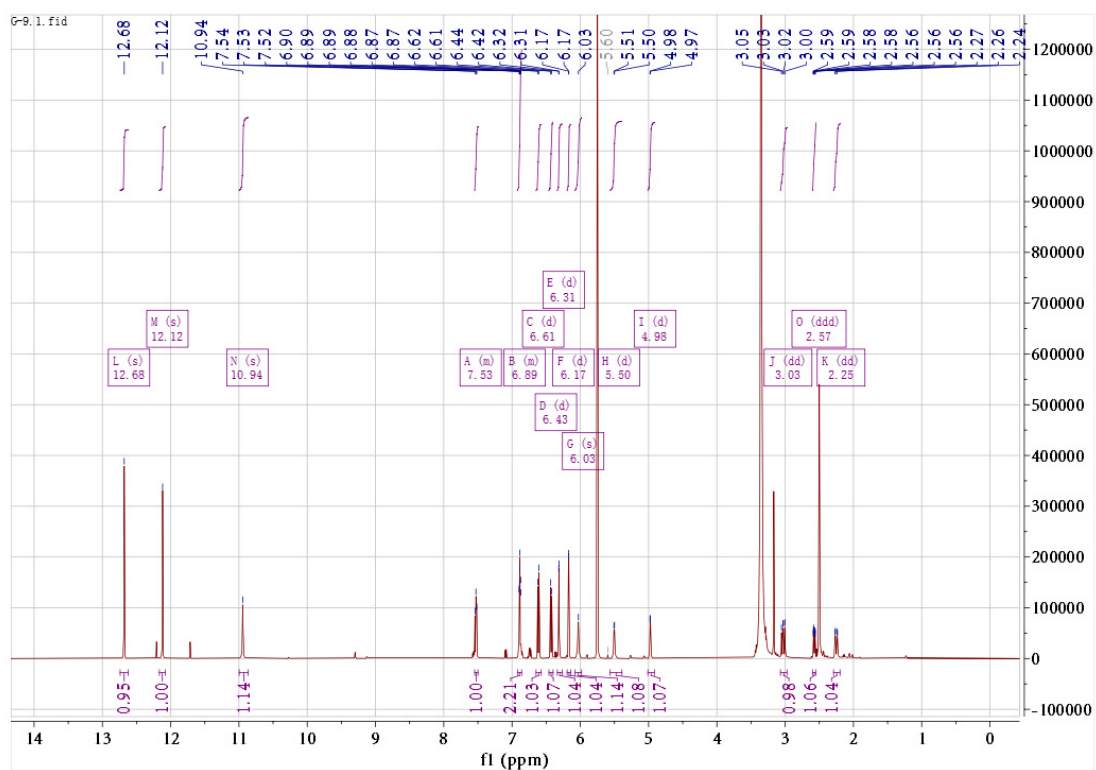

**Figure S10. <sup>1</sup>H NMR spectrum of compound 2 (600 MHz, DMSO)**

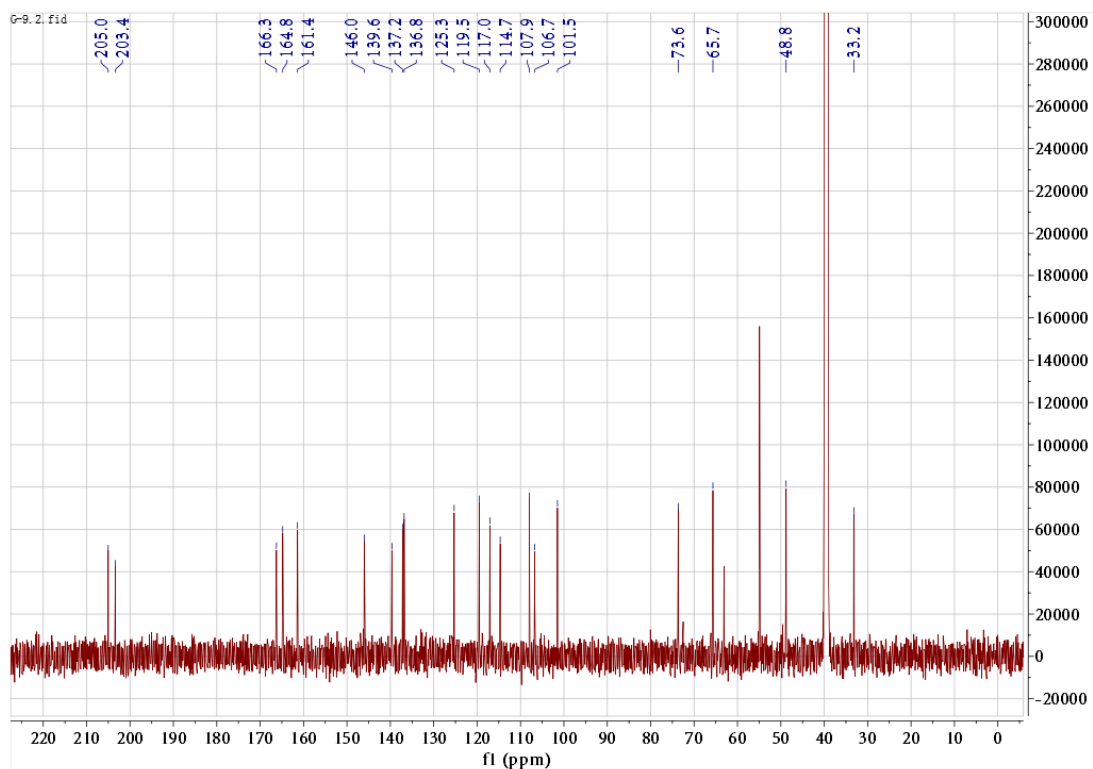

**Figure S11. <sup>13</sup>C NMR spectrum of compound 2 (150 MHz, DMSO)**

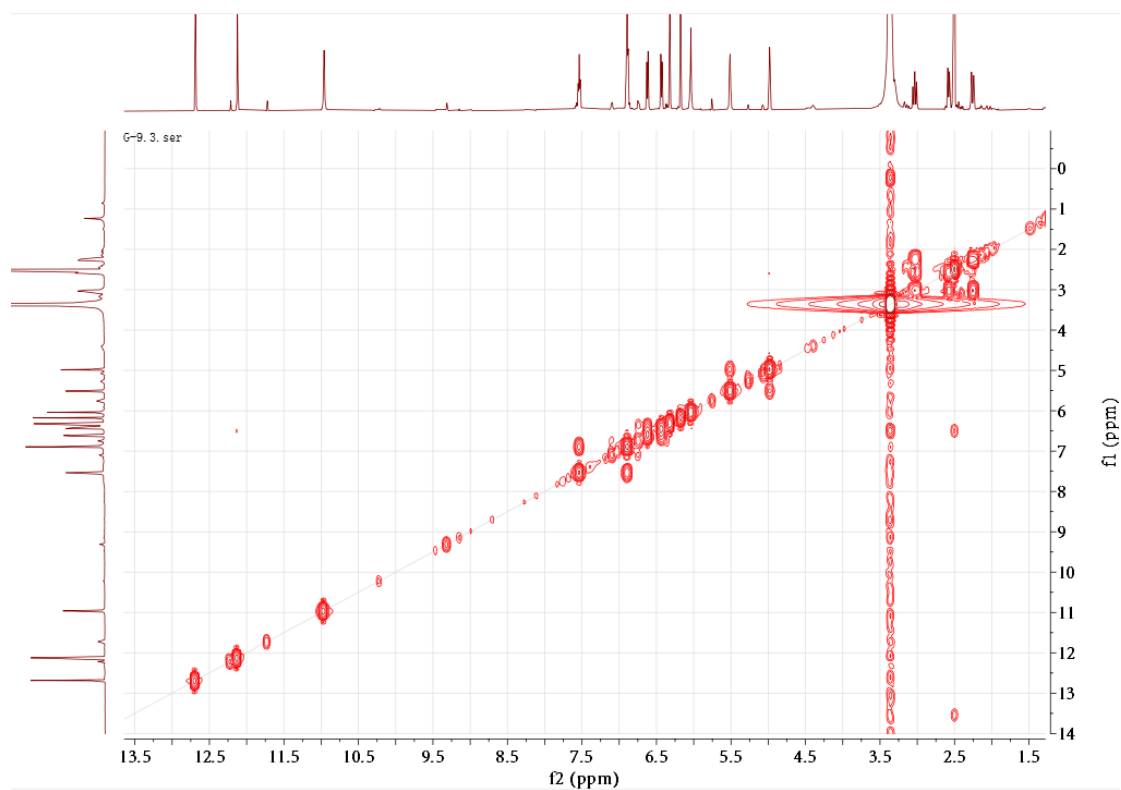

**Figure S12.**  $^1\text{H}$ - $^1\text{H}$  COSY spectrum of compound **2** (DMSO)

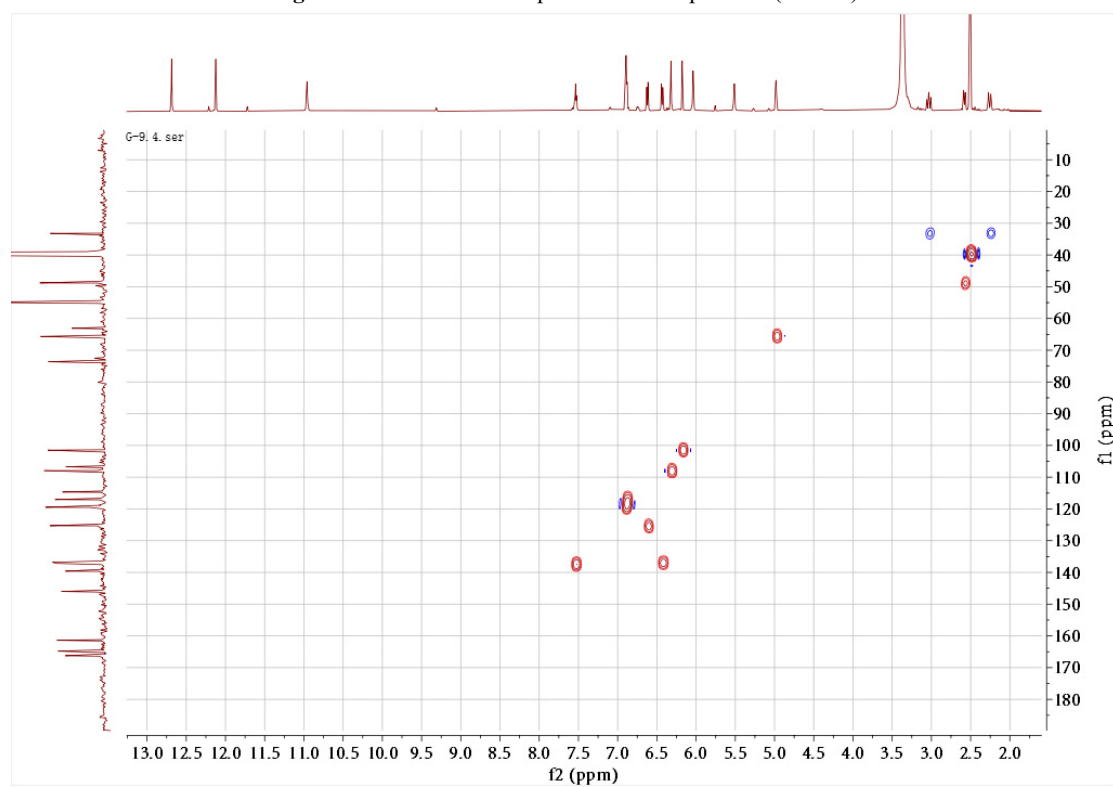

**Figure S13.** HSQC spectrum of compound **2** (DMSO)

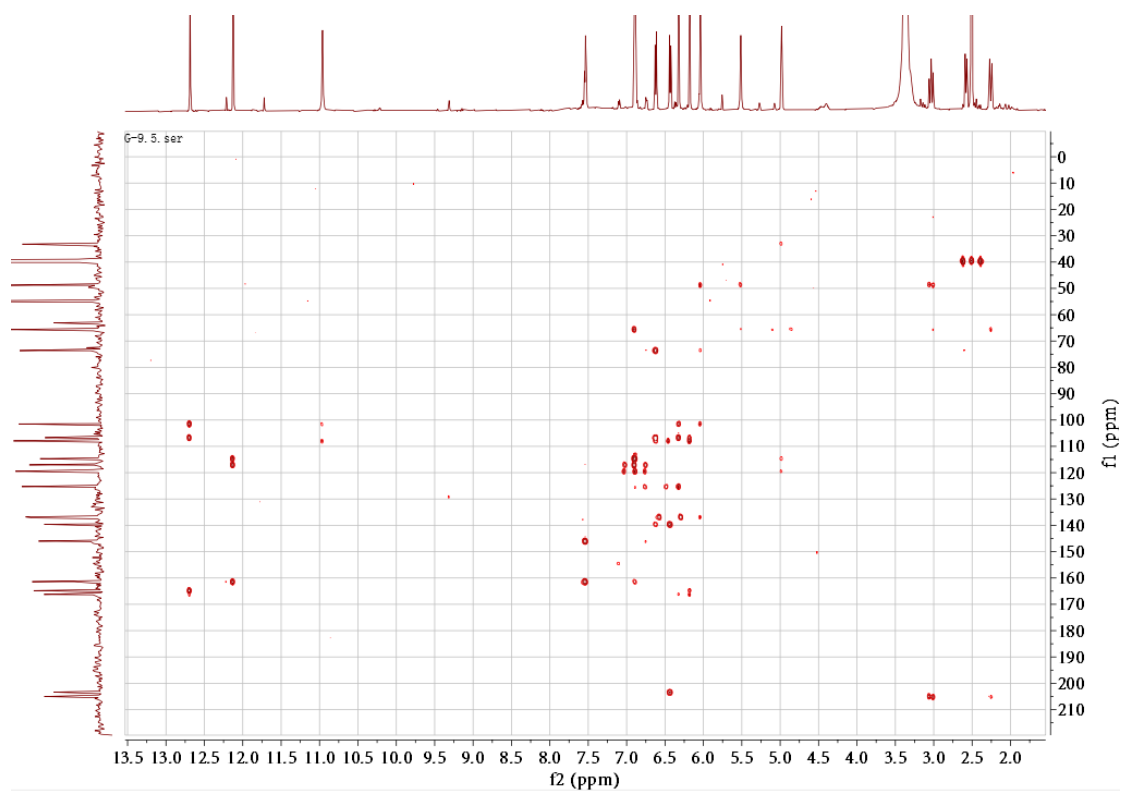

**Figure S14.** HMBC spectrum of compound **2** (DMSO)

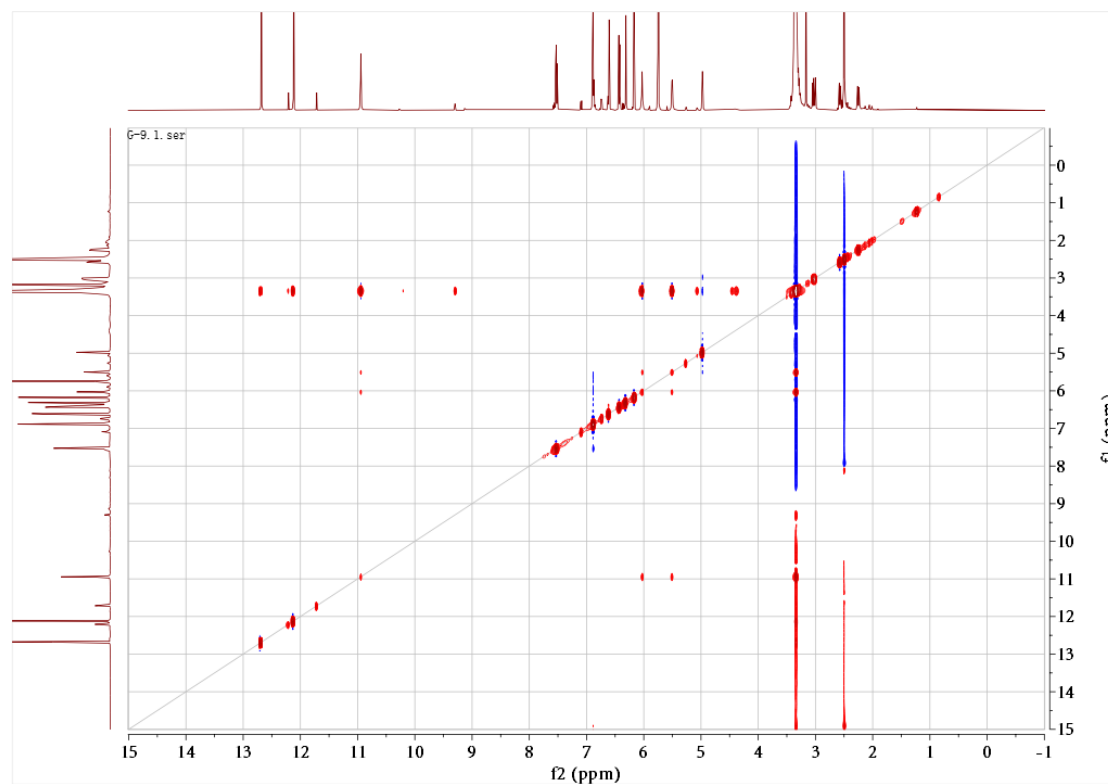

**Figure S15.** NOESY spectrum of compound **2** (DMSO)

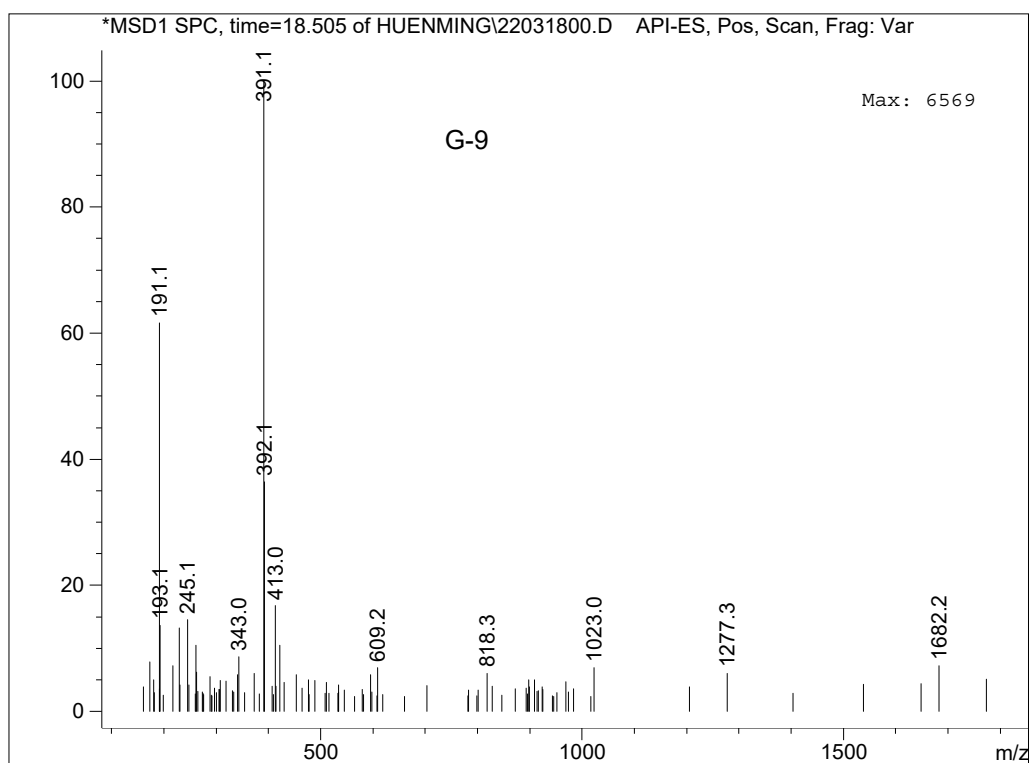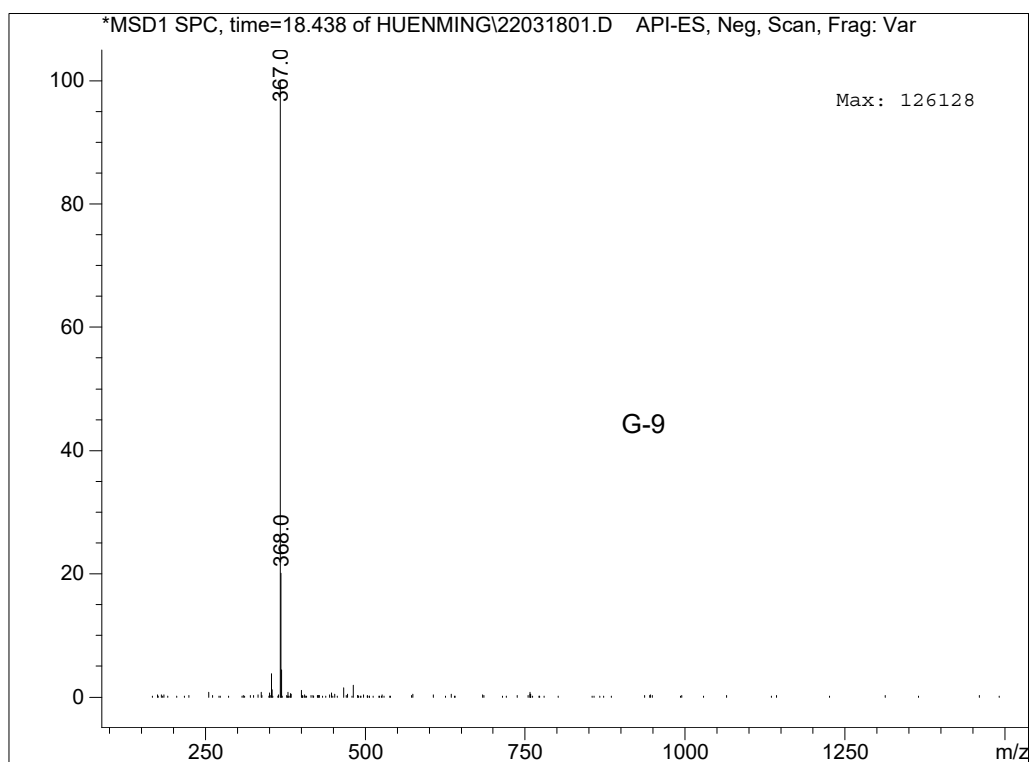

Figure S16. ESIMS of compound 2

Item name: G-9  
Item description:

Channel name: 1: Average Time 0.1291 min : TOF MS (50-1500) ESI+ : Centroided : Combined

1.55e7

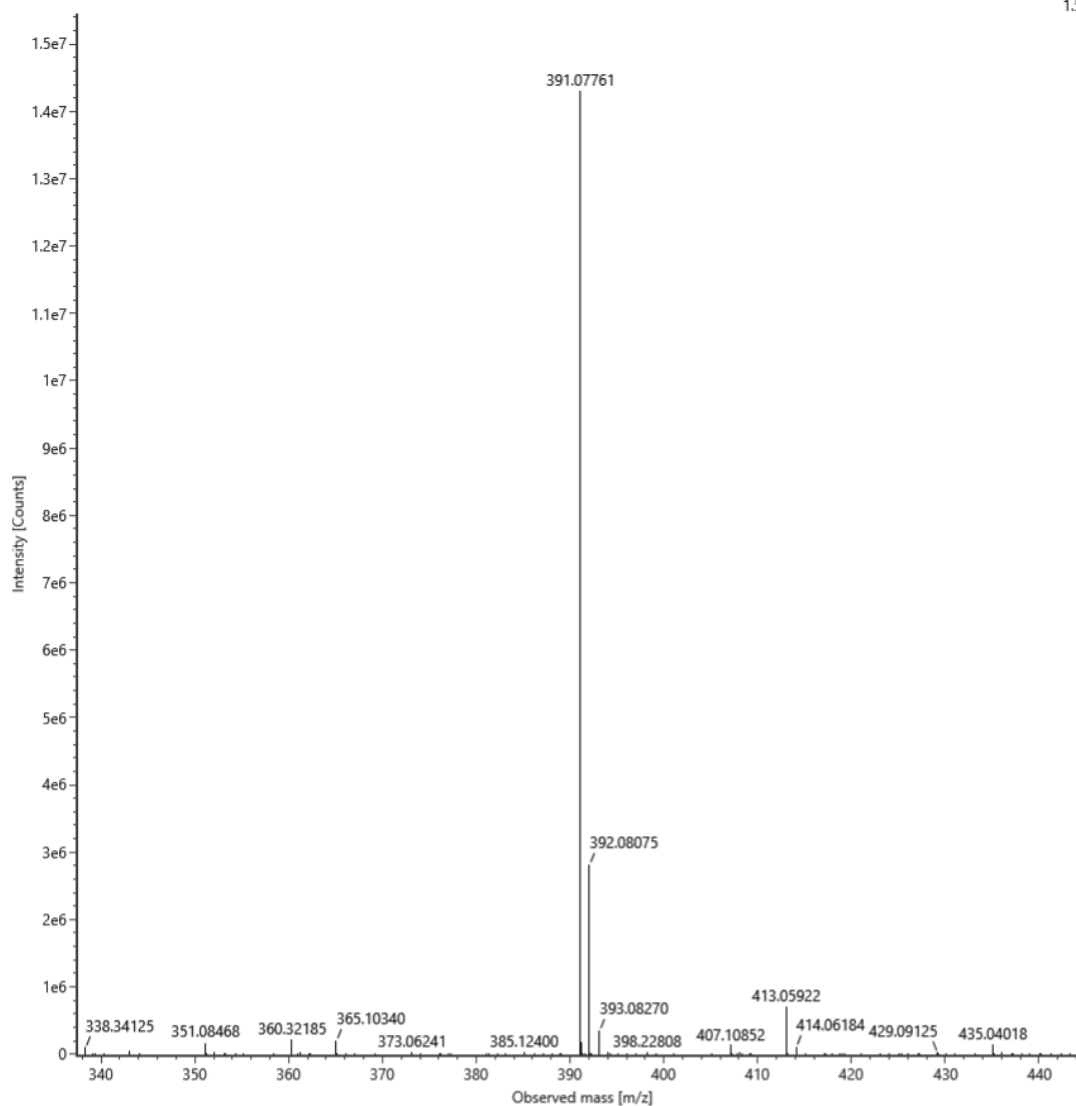

Add:Na<sup>+</sup>

**Composition i-FIT Confidence (%) Predicted m/z m/z error (PPM)**

| Composition                                       | i-FIT Confidence (%) | Predicted m/z | m/z error (PPM) |
|---------------------------------------------------|----------------------|---------------|-----------------|
| C <sub>20</sub> H <sub>16</sub> O <sub>7</sub> Na | 100.000000           | 391.078824    | -3.112122       |

**Figure S17.** HR-ESIMS of compound **2**

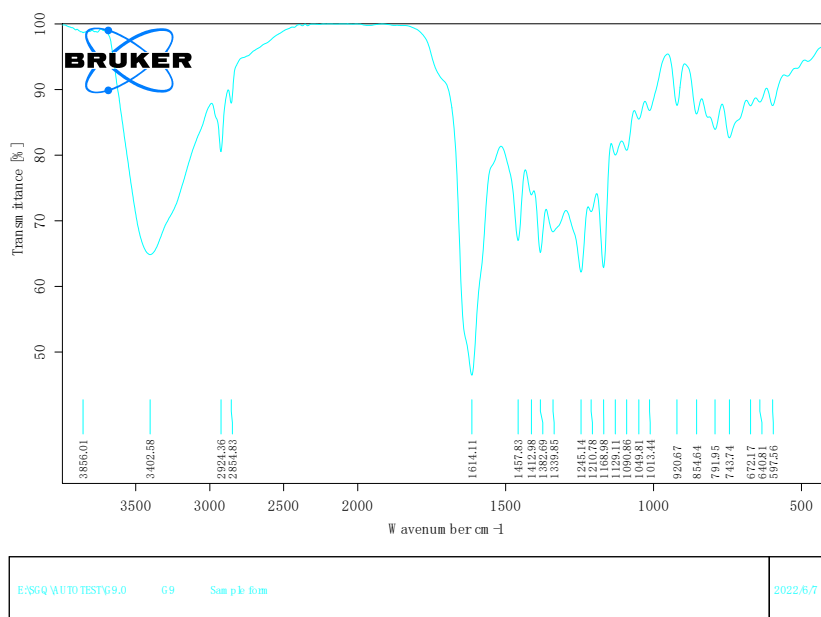

Page 1/1

**Figure S18.** IR (KBr) spectrum of compound **2**

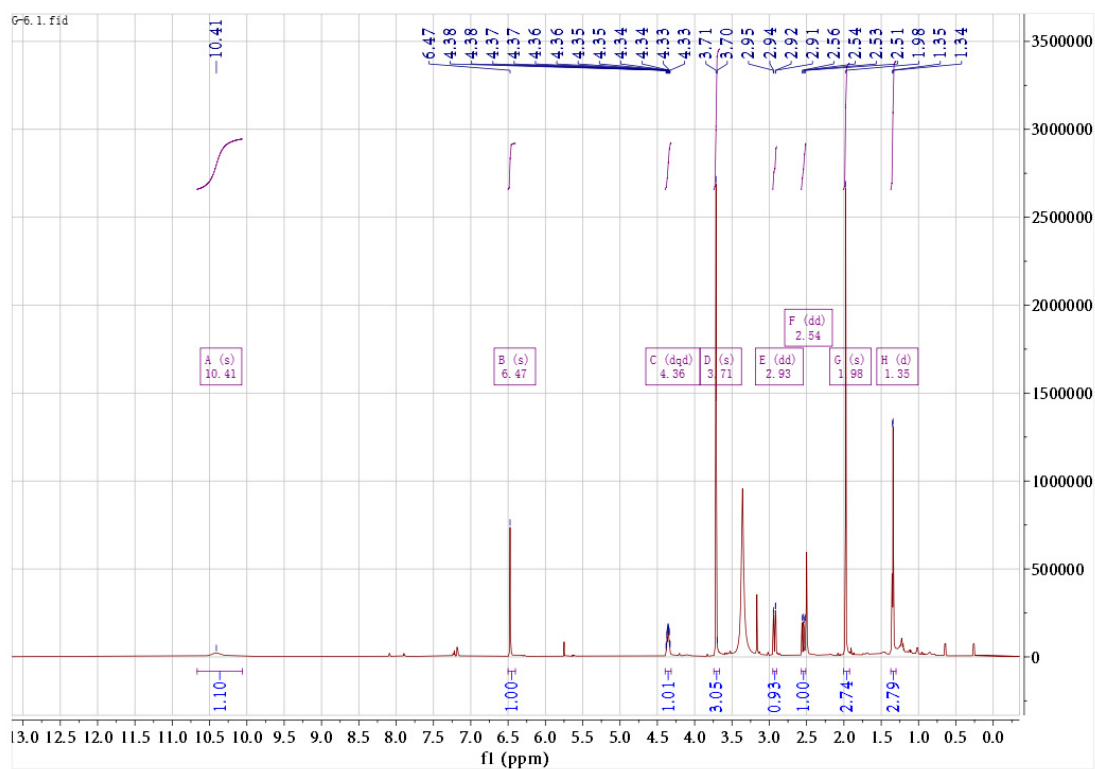

Figure S19.  $^1\text{H}$  NMR spectrum of compound **3** (600 MHz, DMSO)

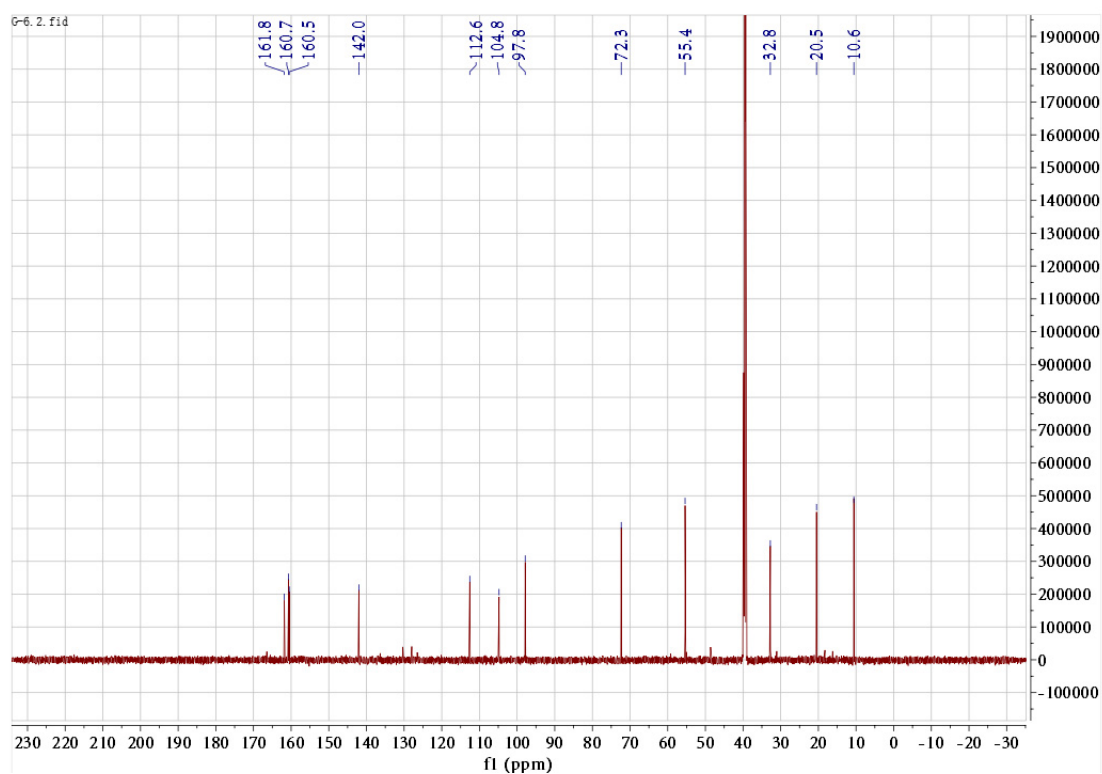

Figure S20.  $^{13}\text{C}$  NMR spectrum of compound **3** (150 MHz, DMSO)

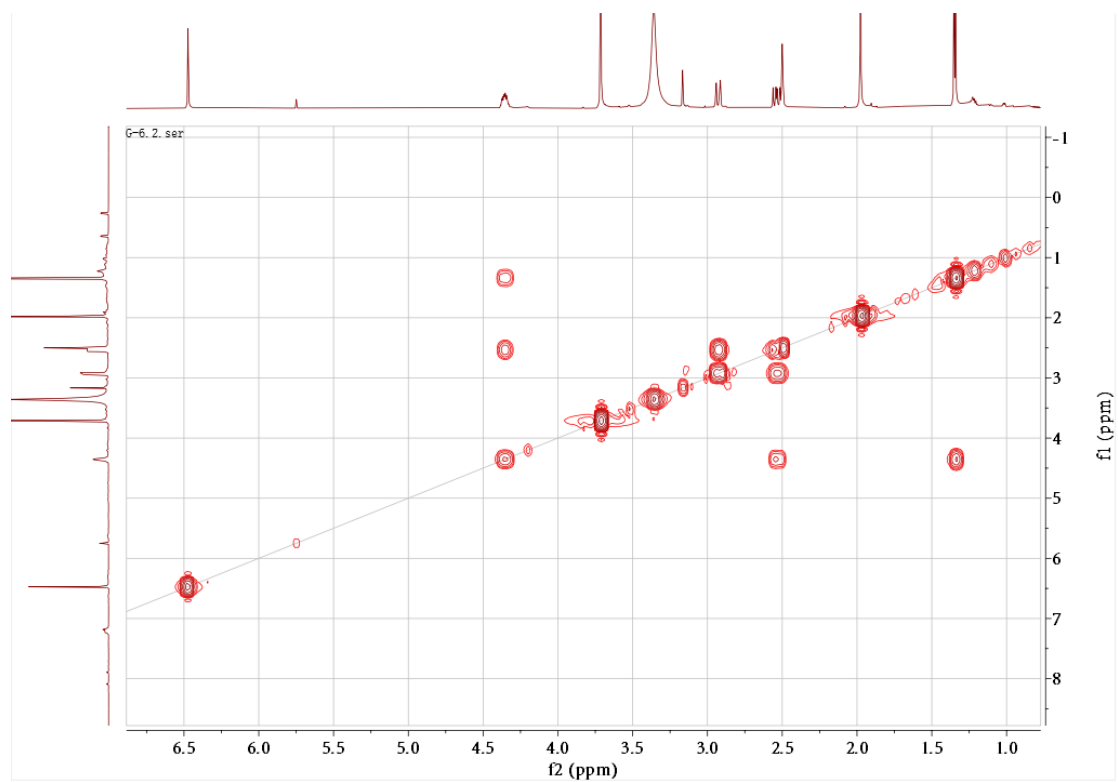

**Figure S21.**  $^1\text{H}$ - $^1\text{H}$  COSY spectrum of compound **3** (DMSO)

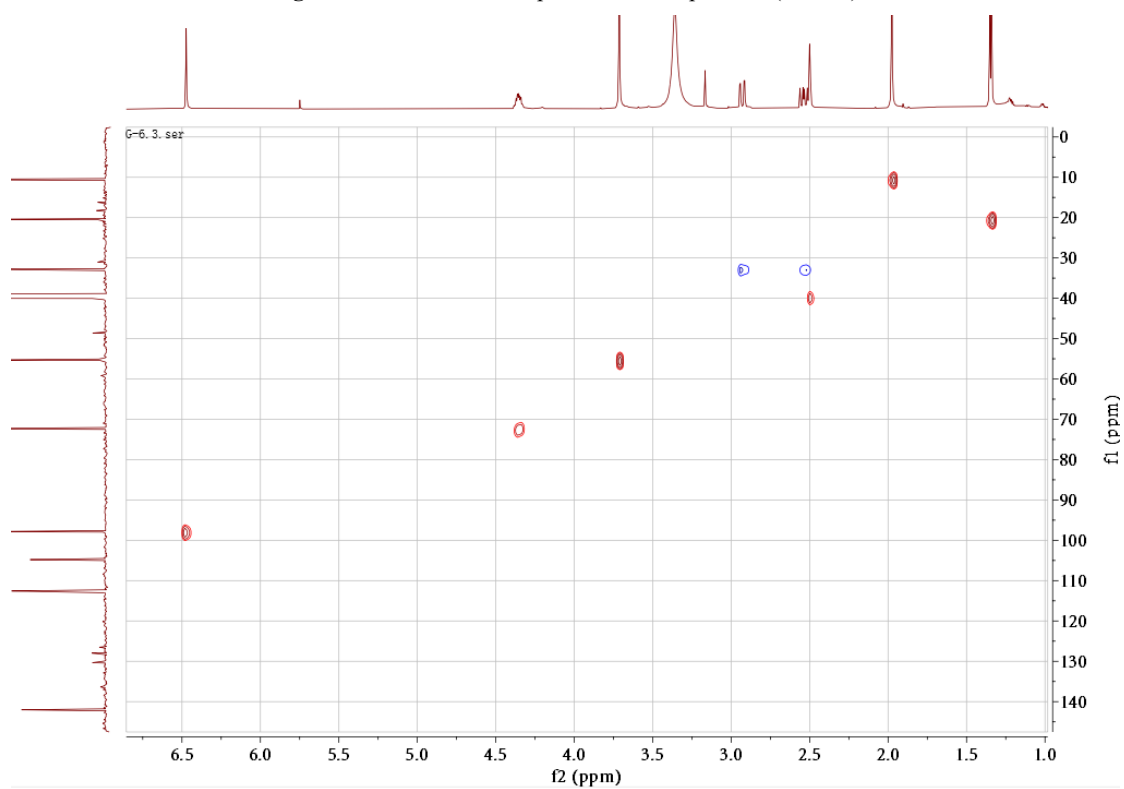

**Figure S22.** HSQC spectrum of compound **3** (DMSO)



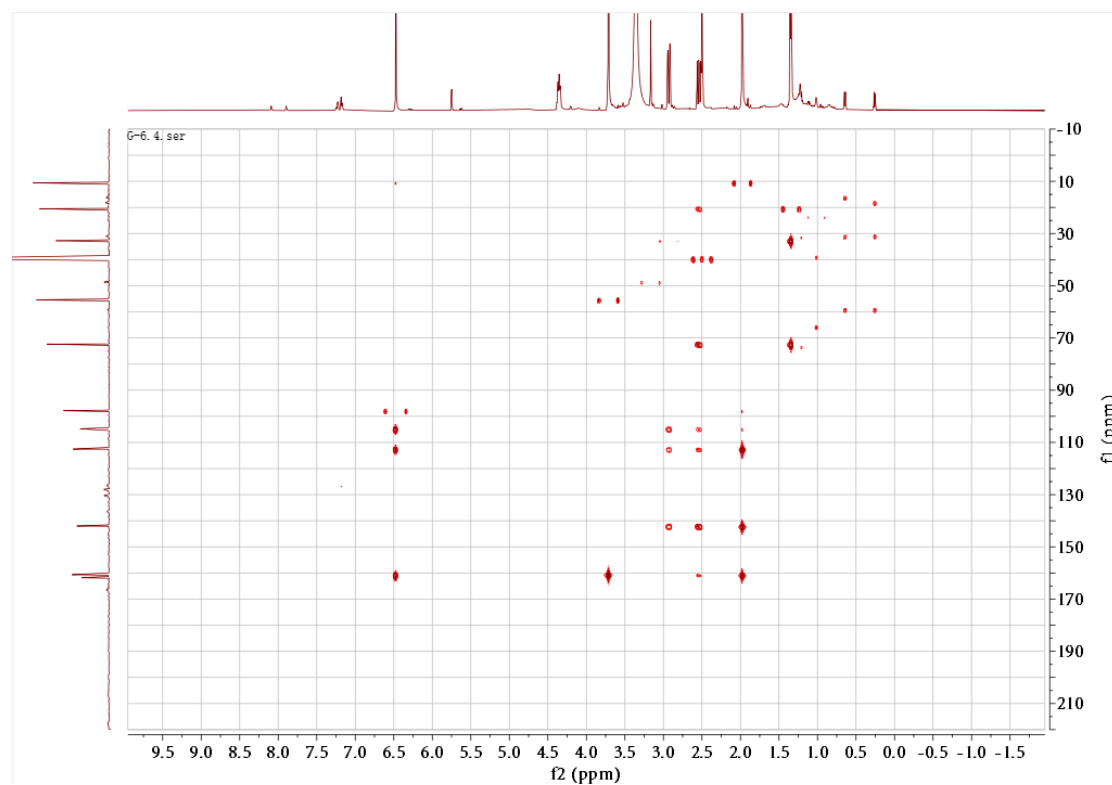

**Figure S23.** HMBC spectrum of compound **3** (DMSO)

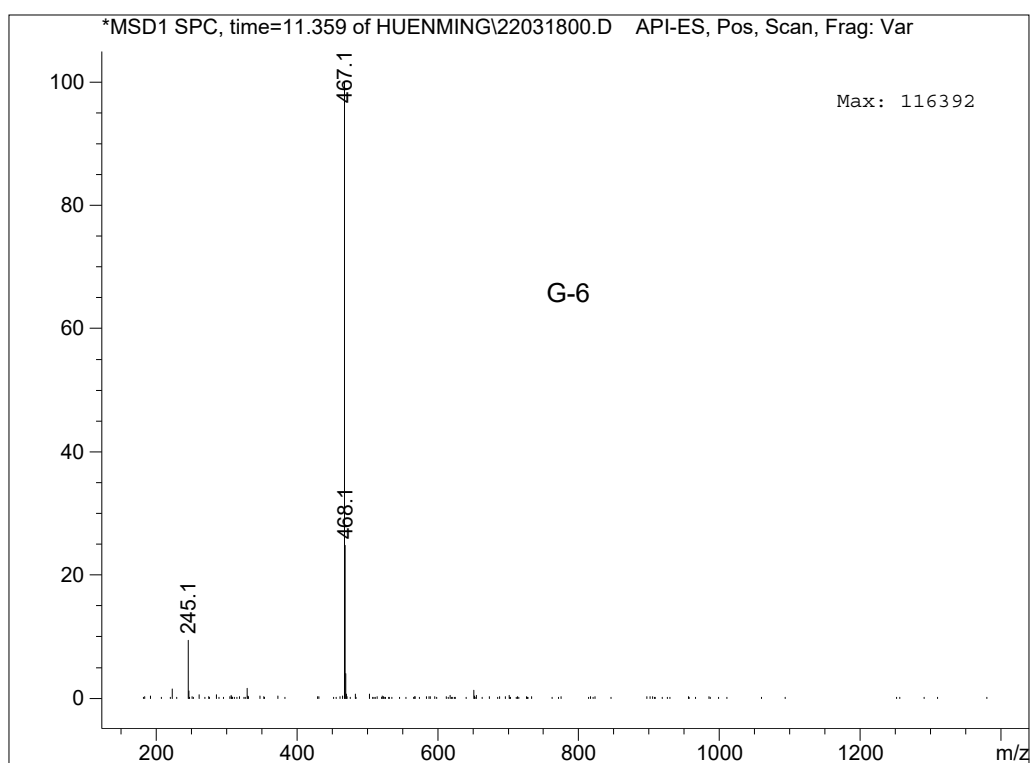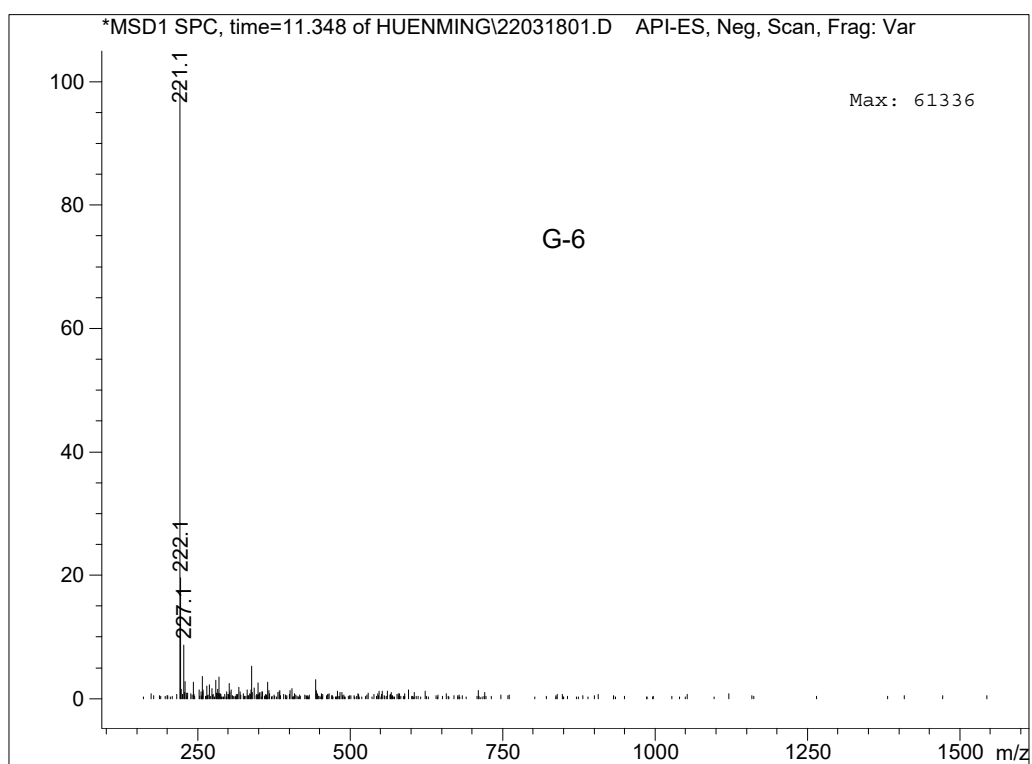

Figure S24. ESIMS of compound 3

Item name: G-6  
Item description:

Channel name: 1: Average Time 0.1174 min : TOF MS (50-1500) ESI+ : Centroided : Combined

2.53e7

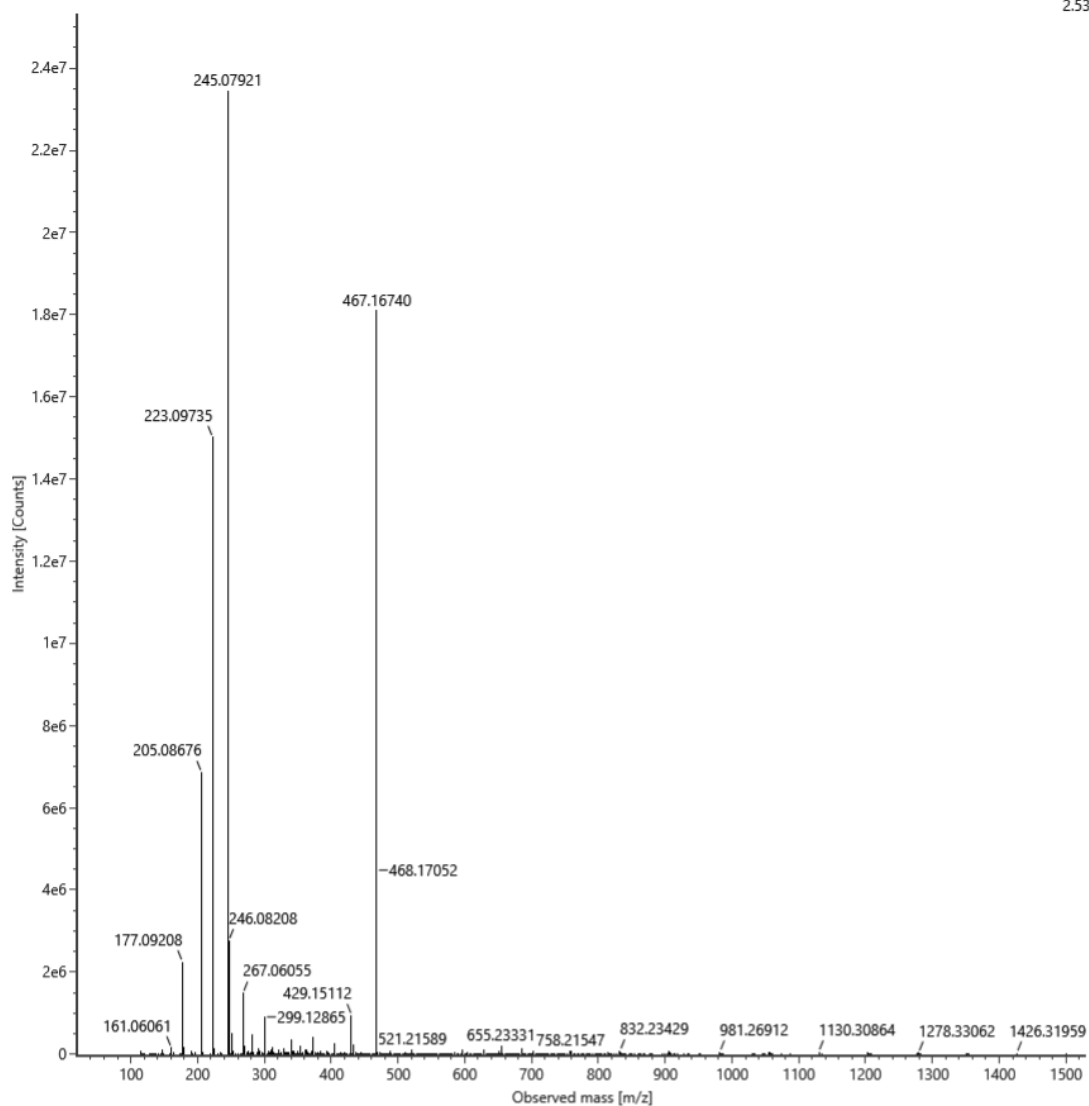

Add:Na<sup>+</sup>

**Composition i-FIT Confidence (%) Predicted m/z m/z error (PPM)**

| Composition                                       | i-FIT Confidence (%) | Predicted m/z | m/z error (PPM) |
|---------------------------------------------------|----------------------|---------------|-----------------|
| C <sub>12</sub> H <sub>14</sub> O <sub>4</sub> Na | 100.000000           | 245.078430    | 3.195714        |

**Figure S25.** HR-ESIMS of compound **3**

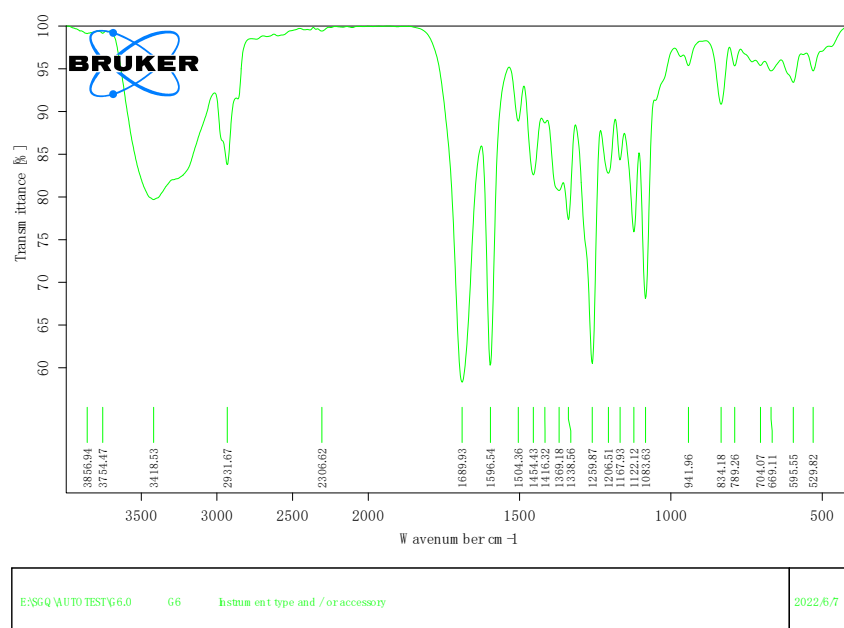

Page 1/1

**Figure S26.** IR (KBr) spectrum of compound **3**

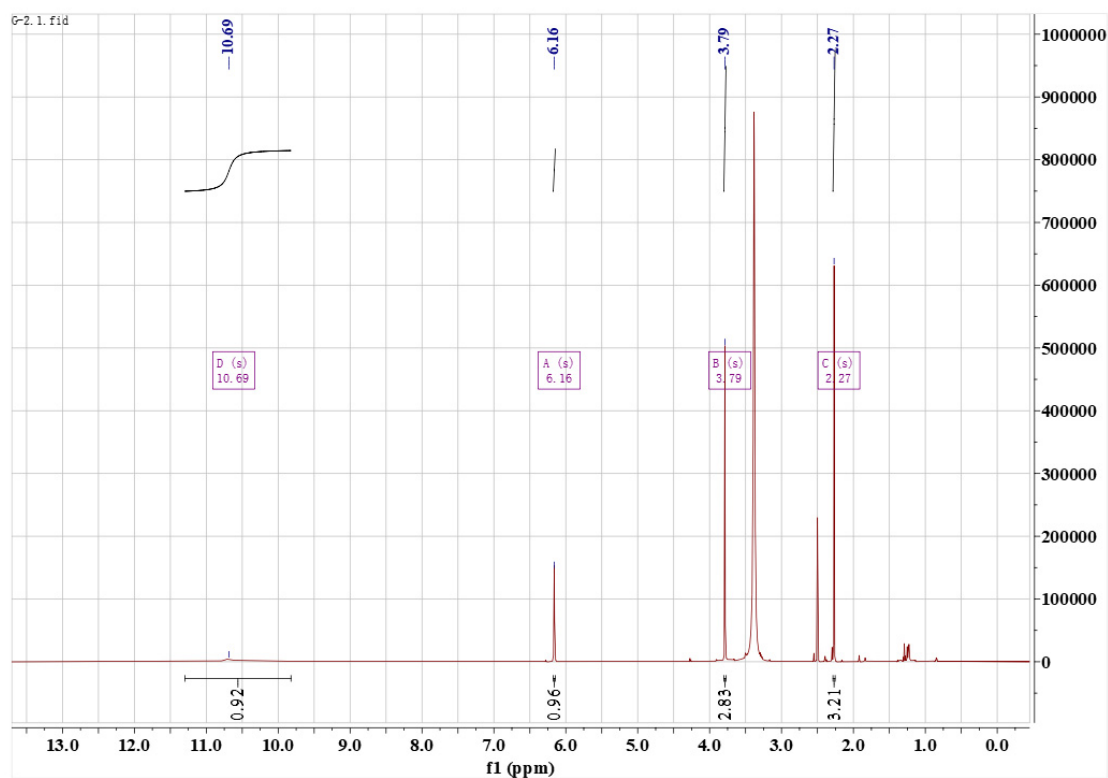

**Figure S27.**  $^1\text{H}$  NMR spectrum of compound **4** (600 MHz, DMSO)

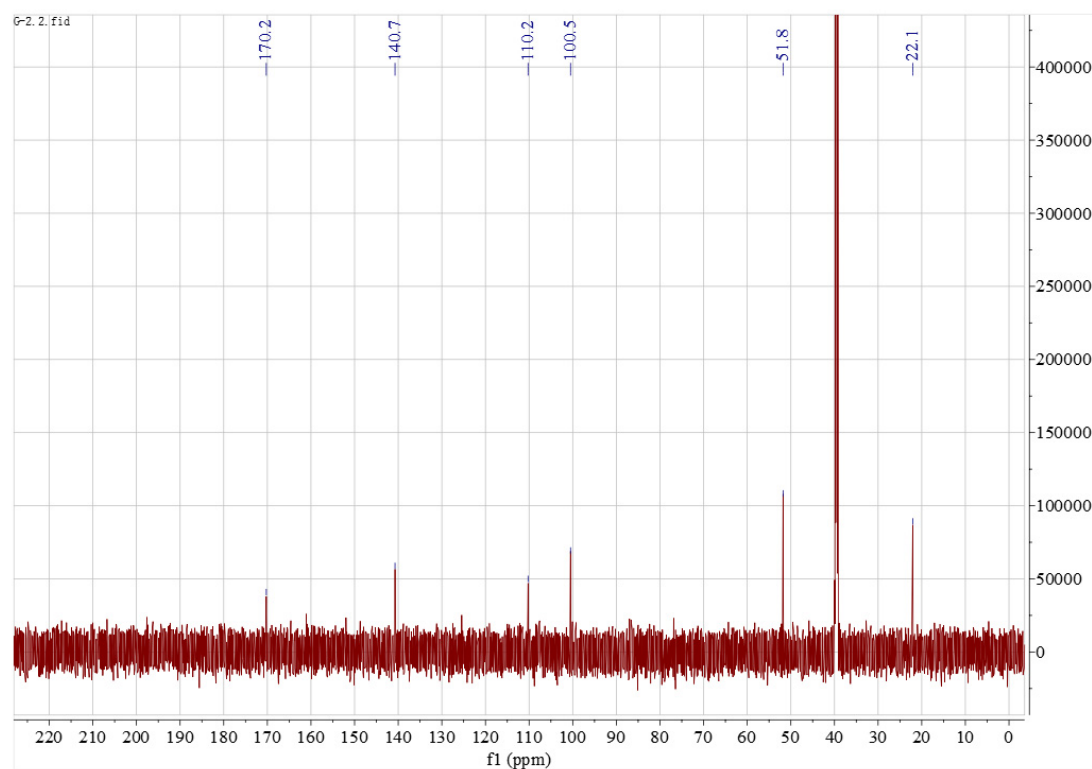

**Figure S28.**  $^{13}\text{C}$  NMR spectrum of compound **4** (150 MHz, DMSO)

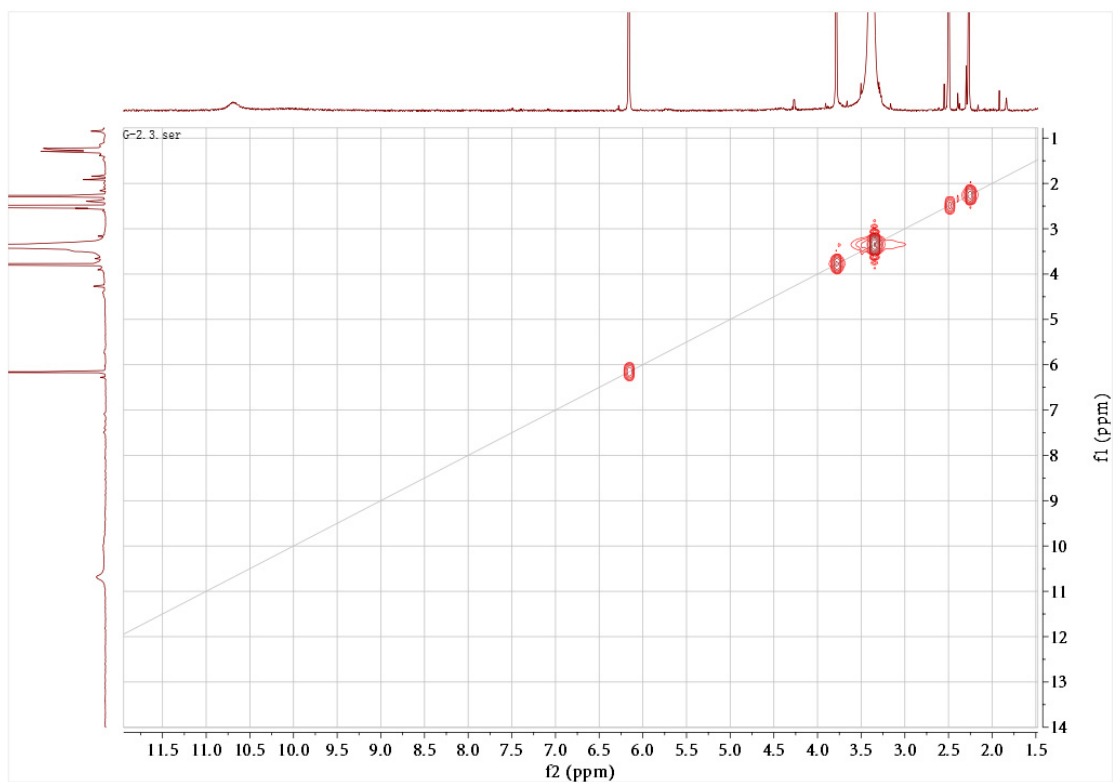

**Figure S29.**  $^1\text{H}$ - $^1\text{H}$  COSY spectrum of compound **4** (DMSO)

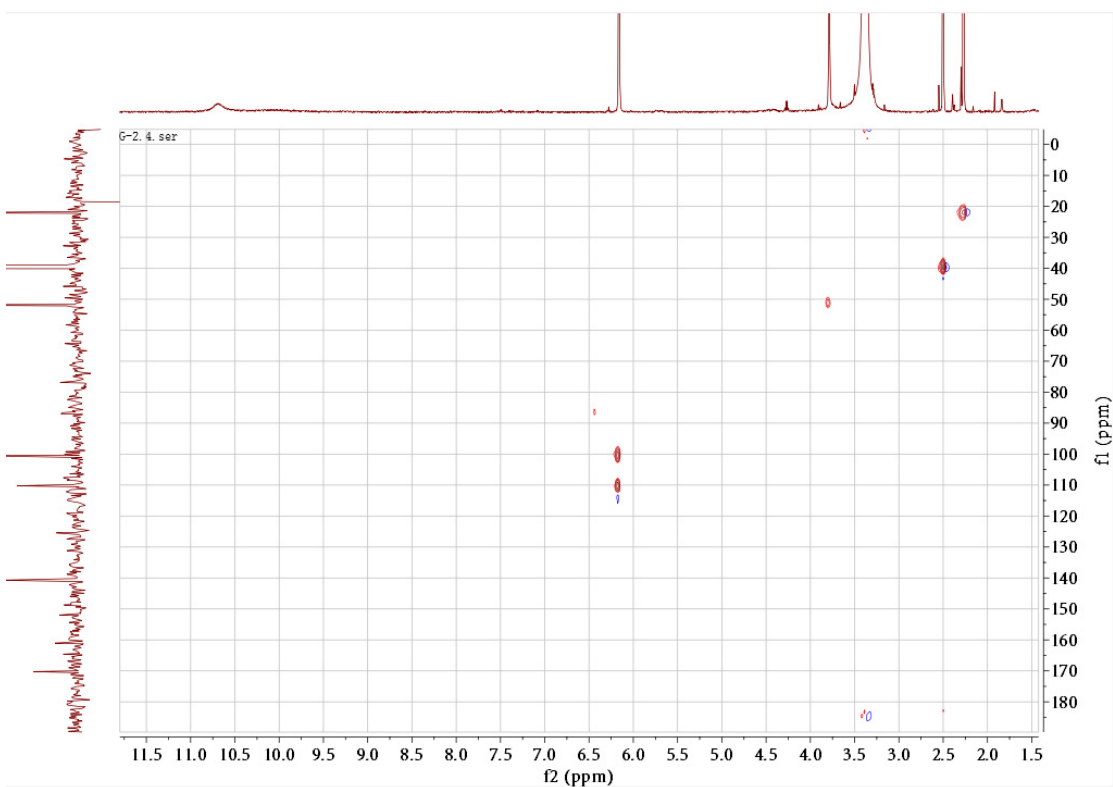

**Figure S30.** HSQC spectrum of compound **4** (DMSO)

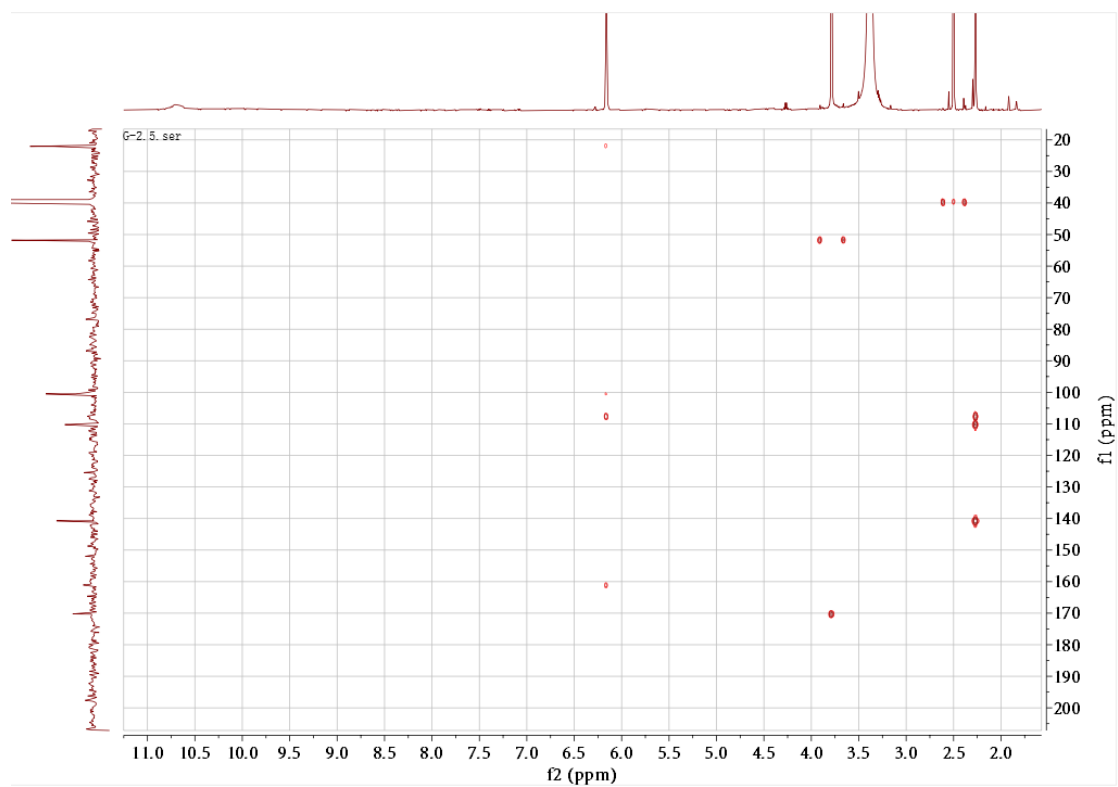

**Figure S31.** HMBC spectrum of compound **4** (DMSO)

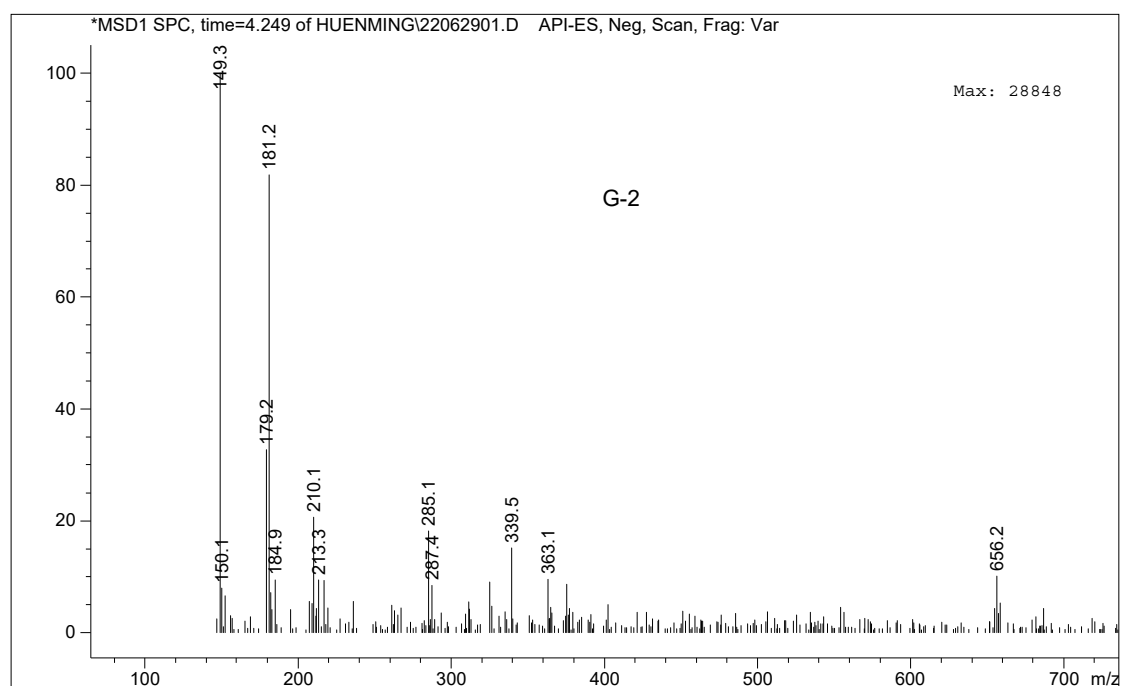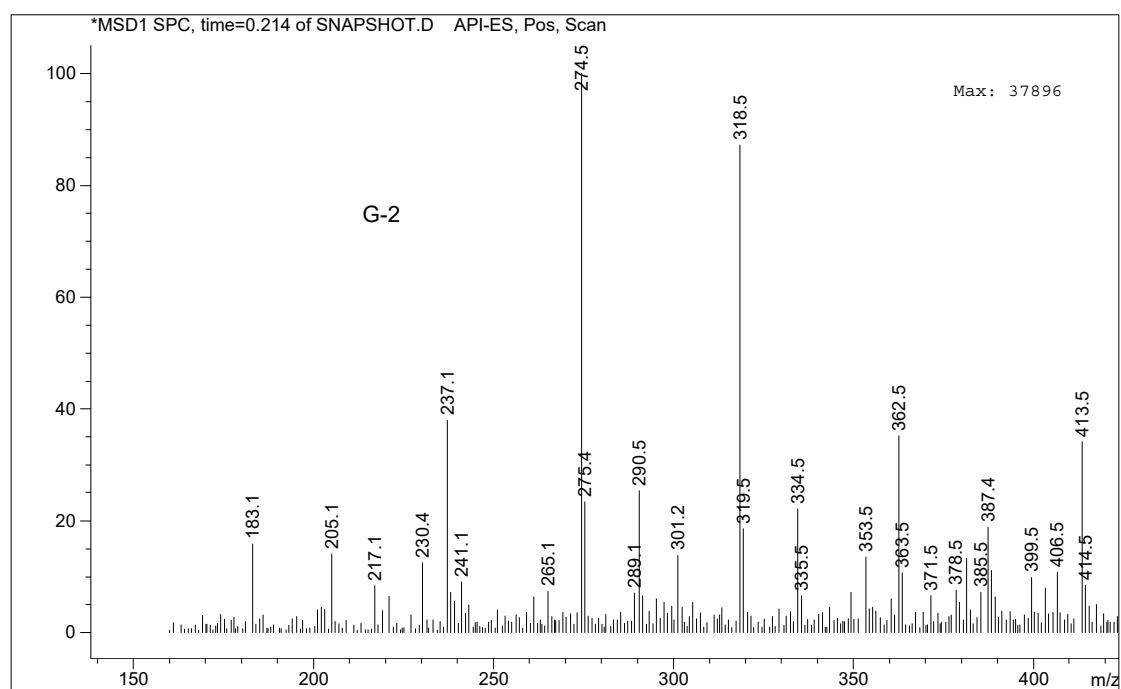

Figure S32. ESIMS of compound 4



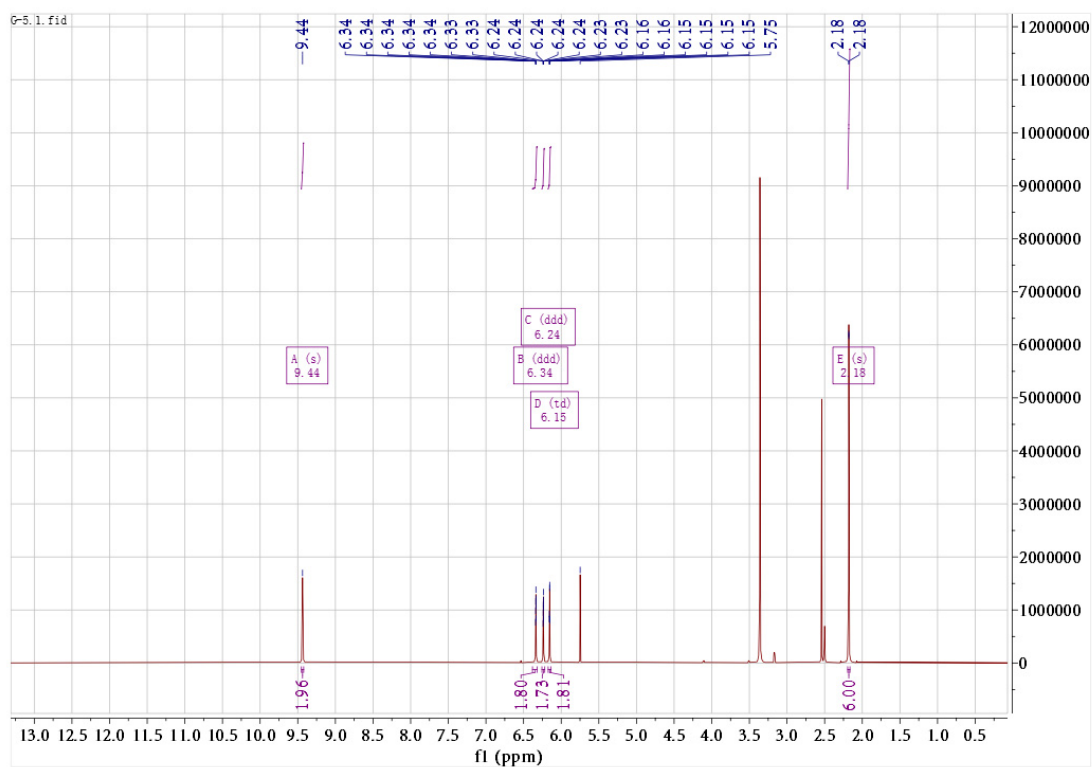

Figure S33.  $^1\text{H}$  NMR spectrum of compound **5** (600 MHz, DMSO)

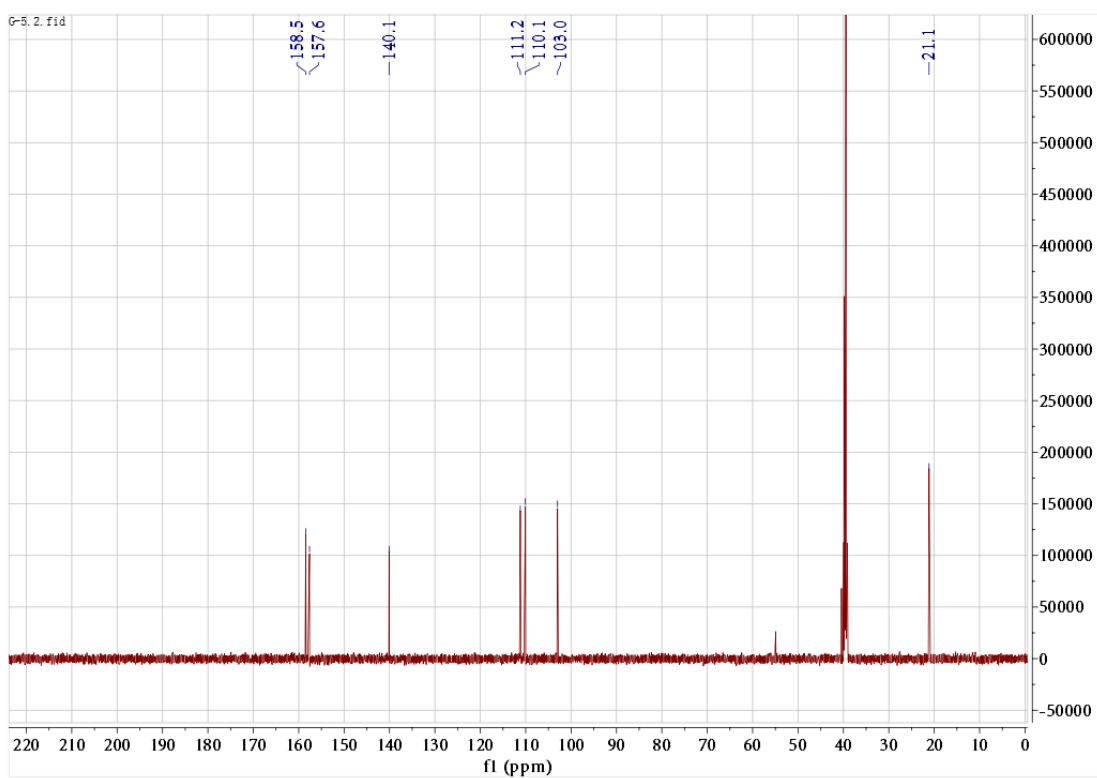

Figure S34.  $^{13}\text{C}$  NMR spectrum of compound **5** (150 MHz, DMSO)

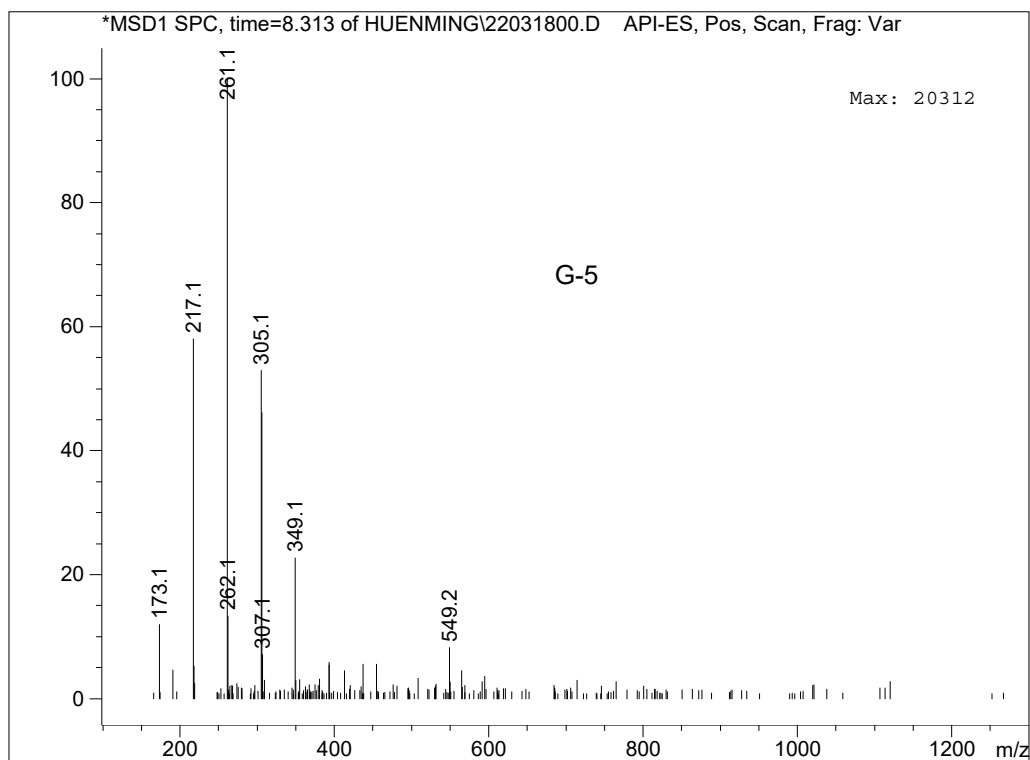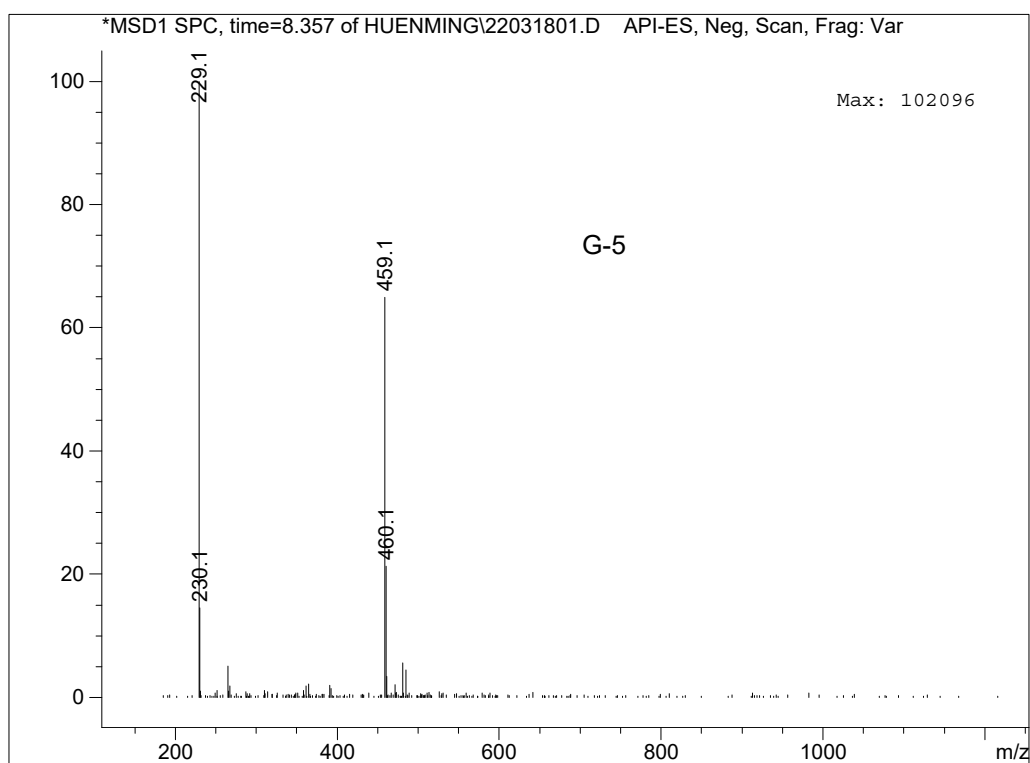

Figure S35. ESIMS of compound 5

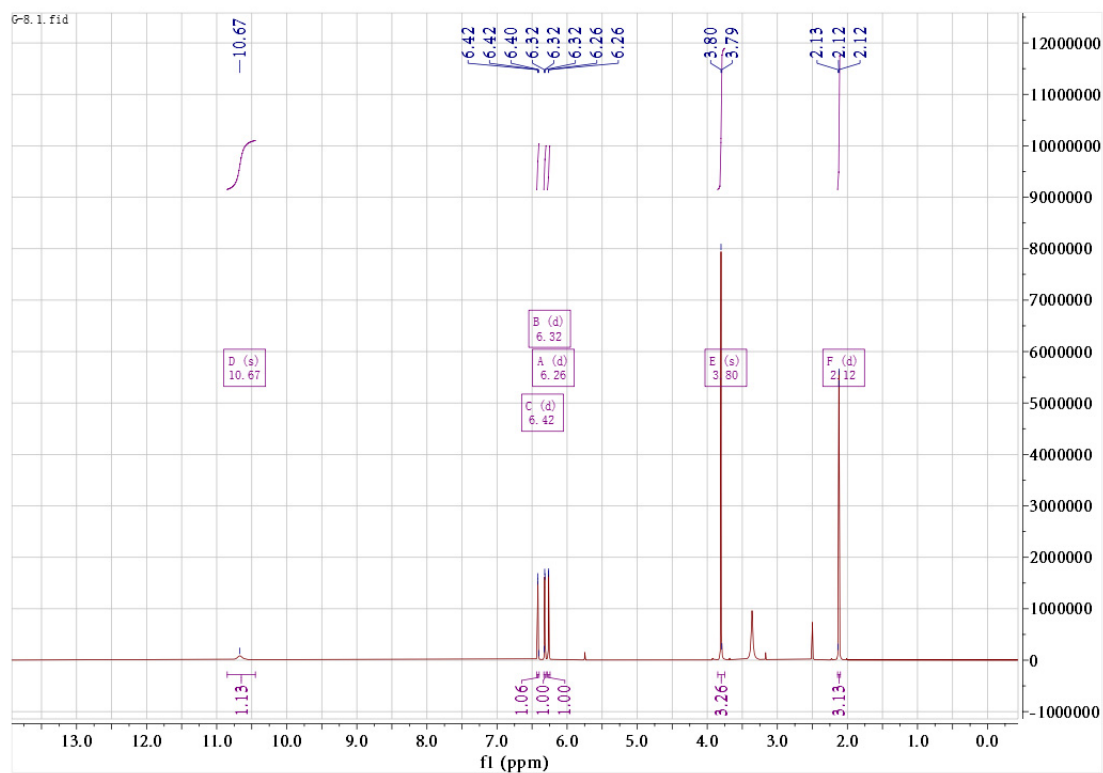

**Figure S36.** <sup>1</sup>H NMR spectrum of compound **6** (600 MHz, DMSO)

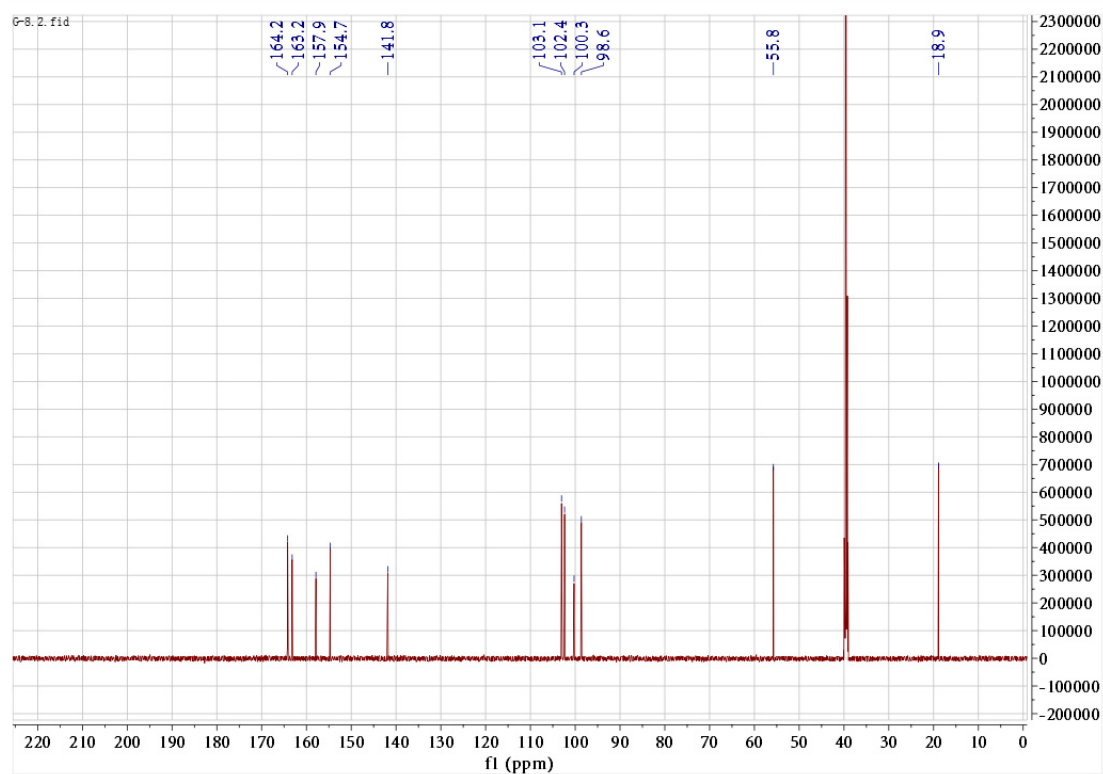

**Figure S37.** <sup>13</sup>C NMR spectrum of compound **6** (150 MHz, DMSO)

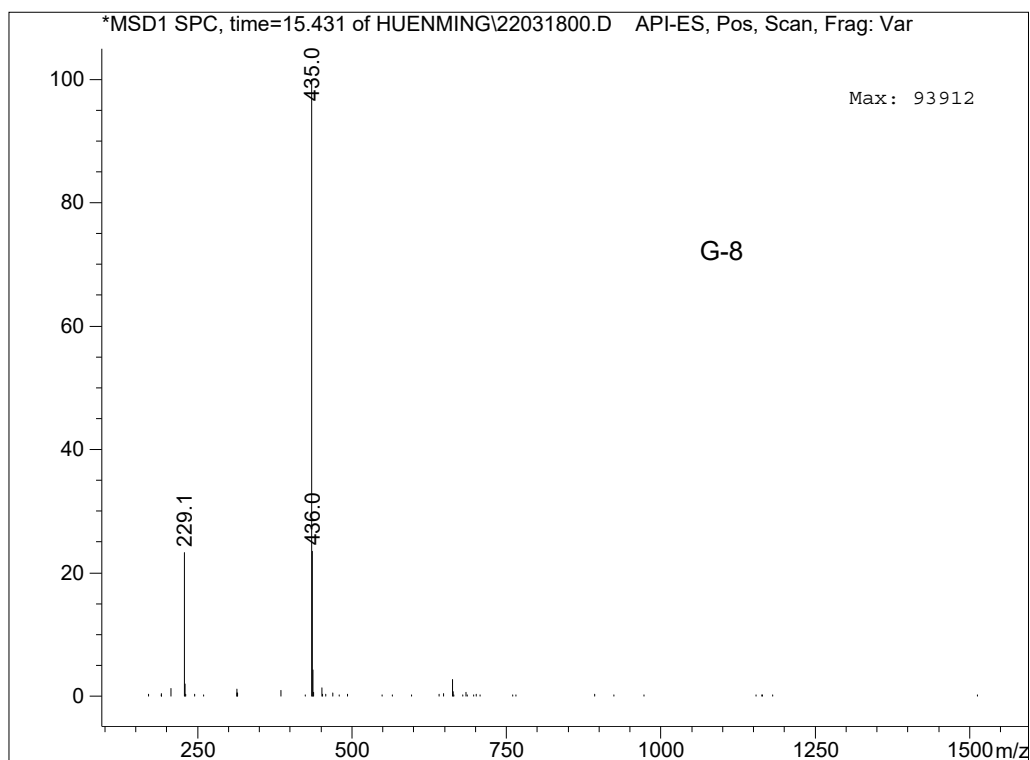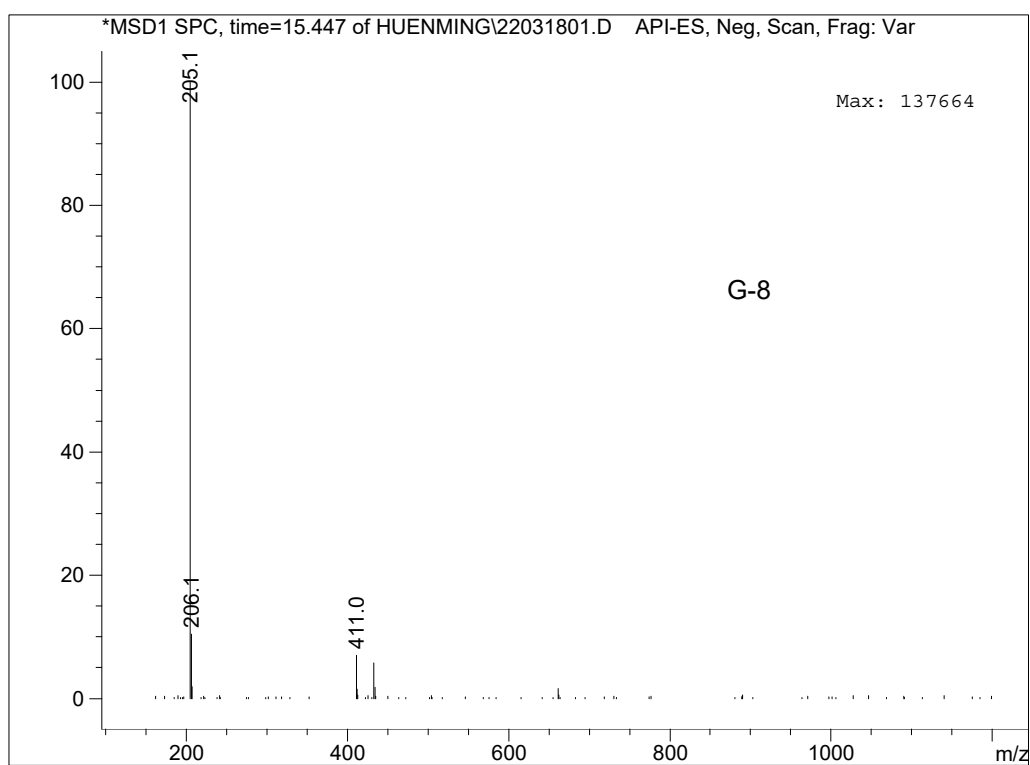

Figure S38. ESIMS of compound 6

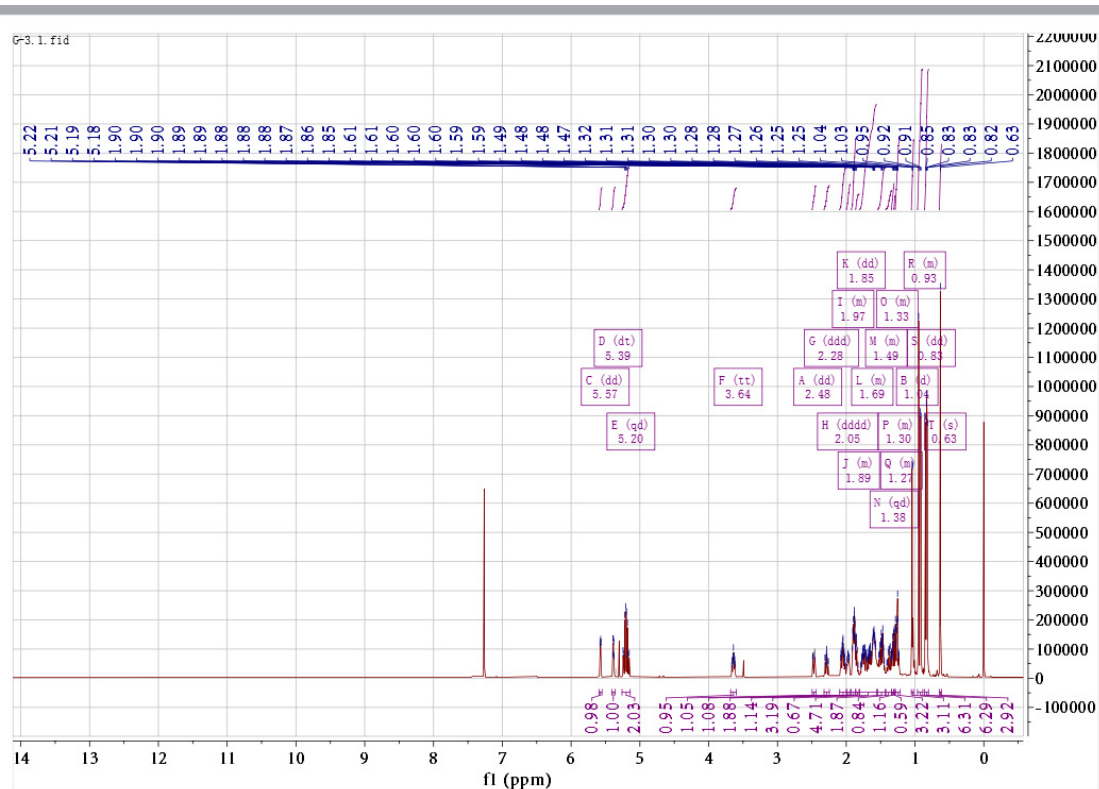

**Figure S39.  $^1\text{H}$  NMR spectrum of compound 7 (600 MHz,  $\text{CDCl}_3$ )**

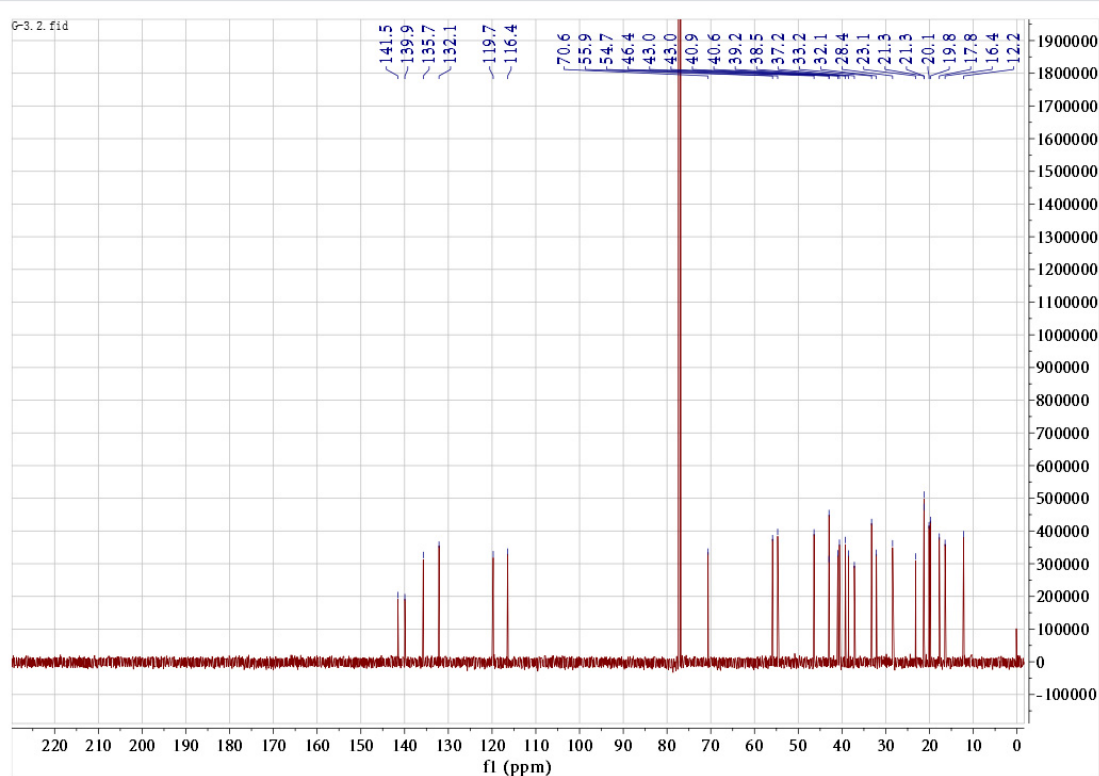

**Figure S40.  $^{13}\text{C}$  NMR spectrum of compound 7 (150 MHz,  $\text{CDCl}_3$ )**

The conformations of the isomers of compounds **1** and **2** were generated by MM+ method embedded in HypeChem. Density functional theory calculations were performed with the Gaussian 16 package (Frisch et al., 2019). The remaining conformers were optimized at the B3LYP/6-31G(d) level in gas phase and the conformers within an energy window of 2 kcal/mol were kept. NMR shielding tensors were calculated with the GIAO method at the mPW1PW91/6-311G(d,p) level with the IEFPCM solvent model in DMSO. The shielding constants were converted into chemical shifts by referencing to TMS at 0 ppm according to the formula  $\delta_{\text{cal}} = \sigma_{\text{TMS}} - \sigma_{\text{cal}}$ , where the  $\sigma_{\text{TMS}}$  (the shielding constant of TMS) was calculated at the same level. DP4+ probability analysis was performed using the calculated NMR shielding tensors with DP4+ excel file (Grimblat et al., 2015). ECD spectra were calculated by the TDDFT methodology at the B3LYP/def2TZVP utilizing IEFPCM in methanol.

(1) Frisch, M. J., Trucks, G. W., Schlegel, H. B., Scuseria, G. E., Robb, M. A., Cheeseman, J. R., et al. (2019). Gaussian 16, Revision C.01. Wallingford CT: Gaussian, Inc.

(2) Grimblat, N., Zanardi, M. M., and Sarotti, A. M. (2015). Beyond DP4: An Improved Probability for the Stereochemical Assignment of Isomeric Compounds Using Quantum Chemical Calculations of NMR Shifts. *J. Org. Chem.* 80, 12526–12534. doi:10.1021/acs.joc.5b02396

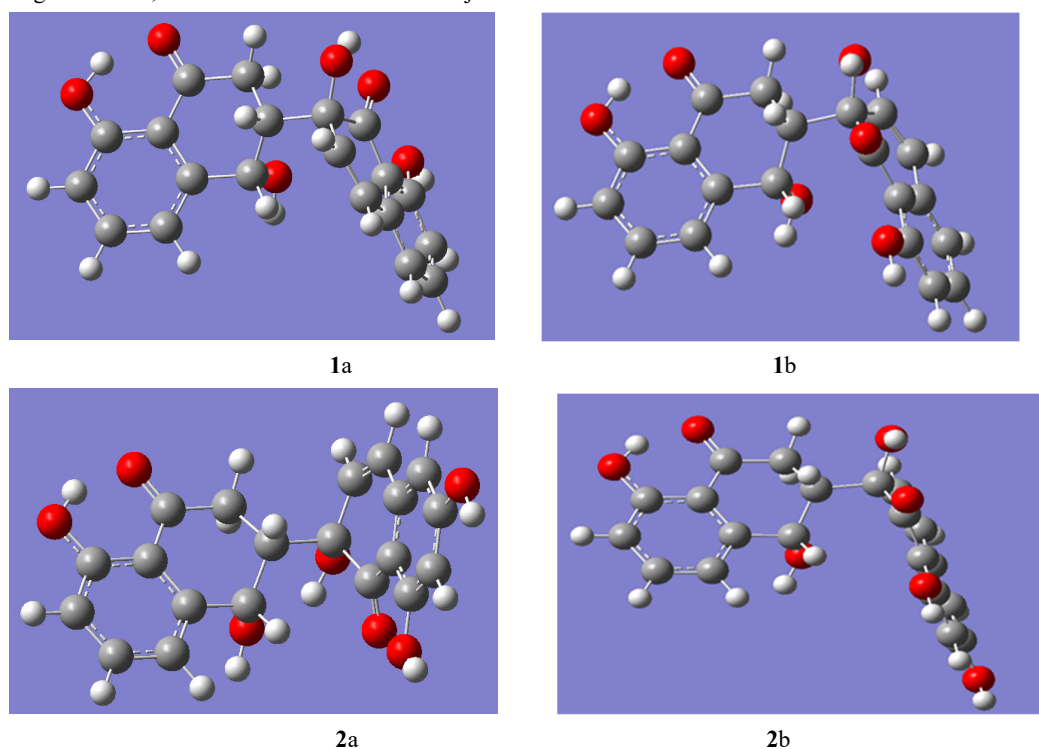

**Figure S41.** Optimized geometries of isomers of **1** and **2** at B3LYP/6-31G(d) level.

**Table. S1.** Optimized cartesian coordinates of conformers of **1** at B3LYP/6-31G(d) level.

|   | <b>1a</b> |         |         | <b>1b</b> |         |         |
|---|-----------|---------|---------|-----------|---------|---------|
| C | -9.4233   | -4.1044 | 2.0695  | -9.8397   | -3.7055 | 0.9459  |
| C | -9.924    | -2.8891 | 2.5292  | -10.2549  | -2.4946 | 1.4941  |
| C | -9.2079   | -1.7107 | 2.3109  | -9.3453   | -1.4459 | 1.6407  |
| C | -7.9805   | -1.7324 | 1.624   | -8.0049   | -1.5958 | 1.2396  |
| C | -7.4808   | -2.9615 | 1.167   | -7.5911   | -2.8221 | 0.6936  |
| C | -8.2081   | -4.1404 | 1.3925  | -8.516    | -3.8679 | 0.5472  |
| C | -7.2095   | -0.45   | 1.434   | -7.0273   | -0.4665 | 1.4689  |
| C | -6.2959   | -0.4854 | 0.189   | -5.8441   | -0.5158 | 0.4859  |
| C | -5.3978   | -1.7337 | 0.2753  | -5.1837   | -1.9025 | 0.5471  |
| C | -6.1832   | -3.0097 | 0.4517  | -6.1729   | -3.0167 | 0.2974  |
| C | -5.4441   | 0.8146  | 0.0319  | -4.8066   | 0.6332  | 0.6643  |
| C | -4.6049   | 0.7964  | -1.217  | -4.007    | 0.6295  | 1.9302  |
| C | -4.8617   | 1.5133  | -2.3166 | -4.0968   | 1.5679  | 2.8799  |
| C | -6.0257   | 2.3935  | -2.3705 | -5.035    | 2.6809  | 2.7423  |
| C | -6.7878   | 2.6688  | -1.2234 | -5.7463   | 2.901   | 1.5514  |
| C | -6.3508   | 2.075   | 0.0746  | -5.479    | 2.0002  | 0.3952  |
| C | -6.3638   | 2.9996  | -3.5888 | -5.2104   | 3.5585  | 3.821   |
| C | -7.4552   | 3.8642  | -3.6705 | -6.0874   | 4.639   | 3.7209  |
| C | -8.2241   | 4.1239  | -2.5383 | -6.8054   | 4.8482  | 2.5455  |
| C | -7.8941   | 3.525   | -1.3204 | -6.6382   | 3.9795  | 1.4656  |
| O | -8.6968   | 3.7613  | -0.2409 | -7.3871   | 4.1822  | 0.3418  |
| O | -6.705    | 2.5603  | 1.15    | -5.727    | 2.3335  | -0.7654 |
| O | -6.4257   | -0.2314 | 2.6038  | -6.5731   | -0.5492 | 2.8138  |
| O | -5.7527   | -4.0935 | 0.0561  | -5.8239   | -4.103  | -0.1667 |
| O | -7.7835   | -5.3751 | 0.9792  | -8.1895   | -5.0925 | 0.0282  |
| H | -6.9462   | -0.5901 | -0.6927 | -6.2627   | -0.4198 | -0.5291 |
| O | -4.4999   | 0.9102  | 1.1004  | -3.8184   | 0.4838  | -0.3786 |
| H | -9.9747   | -5.0255 | 2.2407  | -10.5433  | -4.5266 | 0.8329  |
| H | -10.872   | -2.8622 | 3.0615  | -11.2882  | -2.3714 | 1.8104  |
| H | -9.616    | -0.7715 | 2.6821  | -9.6889   | -0.5092 | 2.0773  |
| H | -7.9273   | 0.372   | 1.3395  | -7.5584   | 0.4848  | 1.3518  |
| H | -4.8296   | -1.8448 | -0.655  | -4.4116   | -1.9795 | -0.2271 |
| H | -4.683    | -1.6693 | 1.1034  | -4.7147   | -2.0923 | 1.5184  |
| H | -3.7176   | 0.1668  | -1.2021 | -3.3041   | -0.1884 | 2.0669  |
| H | -4.2052   | 1.4544  | -3.1799 | -3.4867   | 1.5021  | 3.7755  |
| H | -5.7769   | 2.8078  | -4.4853 | -4.6629   | 3.4093  | 4.7497  |
| H | -7.7079   | 4.3311  | -4.6199 | -6.2134   | 5.3145  | 4.5639  |
| H | -9.0818   | 4.7855  | -2.6236 | -7.4959   | 5.6853  | 2.4908  |
| H | -9.2114   | 4.5714  | -0.3887 | -7.7493   | 5.0831  | 0.3448  |
| H | -7.03     | -0.2489 | 3.3684  | -7.2649   | -0.9657 | 3.3573  |
| H | -6.9105   | -5.2623 | 0.5382  | -7.2319   | -5.0784 | -0.201  |
| H | -5.035    | 0.9173  | 1.9238  | -4.0714   | 1.1093  | -1.0888 |

**Table S2.** The results of the DP4<sup>+</sup> analysis of **1**

| Functional<br>mPW1PW91 |      | Solvent?<br>PCl <sub>4</sub> | Basis Set<br>6-31+G(d,p) |                     | Type of Data<br>Shielding Tensors |               |               |
|------------------------|------|------------------------------|--------------------------|---------------------|-----------------------------------|---------------|---------------|
|                        |      | DP4+<br>Experimental         | 0.00%<br>Isomer 1        | 100.00%<br>Isomer 2 | –<br>Isomer 3                     | –<br>Isomer 4 | –<br>Isomer 5 |
| Nuclei                 | sp2? |                              |                          |                     |                                   |               |               |
| C                      |      | 205.1                        | -7.8                     | -7.9                |                                   |               |               |
| C                      |      | 32.8                         | 159.0                    | 160.2               |                                   |               |               |
| C                      |      | 49.2                         | 147.1                    | 139.5               |                                   |               |               |
| C                      |      | 65.9                         | 123.4                    | 125.5               |                                   |               |               |
| C                      | x    | 145.7                        | 53.5                     | 51.1                |                                   |               |               |
| C                      | x    | 119.7                        | 81.2                     | 80.7                |                                   |               |               |
| C                      | x    | 137.1                        | 59.0                     | 59.8                |                                   |               |               |
| C                      | x    | 117.1                        | 79.7                     | 79.9                |                                   |               |               |
| C                      | x    | 161.4                        | 35.2                     | 35.0                |                                   |               |               |
| C                      | x    | 114.7                        | 82.3                     | 82.7                |                                   |               |               |
| C                      | x    | 206.4                        | -7.5                     | -7.0                |                                   |               |               |
| C                      |      | 73.5                         | 111.6                    | 117.1               |                                   |               |               |
| C                      | x    | 136.3                        | 59.9                     | 62.9                |                                   |               |               |
| C                      | x    | 125.7                        | 69.7                     | 68.3                |                                   |               |               |
| C                      | x    | 137.6                        | 57.0                     | 54.9                |                                   |               |               |
| C                      | x    | 118.9                        | 78.1                     | 78.2                |                                   |               |               |
| C                      | x    | 137.8                        | 61.6                     | 60.2                |                                   |               |               |
| C                      | x    | 117.1                        | 82.1                     | 82.4                |                                   |               |               |
| C                      | x    | 161.5                        | 41.8                     | 41.4                |                                   |               |               |
| C                      | x    | 113.2                        | 79.5                     | 82.3                |                                   |               |               |



**Table. S3.** Optimized cartesian coordinates of conformers of 2 at B3LYP/6-31G(d) level

|   | <b>2a</b> |         |         | <b>2b</b> |         |         |
|---|-----------|---------|---------|-----------|---------|---------|
| C | -9.3964   | -4.235  | 2.2546  | -9.9012   | -3.712  | 0.8603  |
| C | -9.9058   | -3.0171 | 2.6976  | -10.2848  | -2.5119 | 1.4533  |
| C | -9.1999   | -1.8363 | 2.4598  | -9.3426   | -1.5033 | 1.6617  |
| C | -7.9743   | -1.8585 | 1.7697  | -8.0006   | -1.6828 | 1.2783  |
| C | -7.4657   | -3.0901 | 1.3298  | -7.6189   | -2.8987 | 0.6873  |
| C | -8.1827   | -4.2713 | 1.5749  | -8.5764   | -3.9038 | 0.4788  |
| C | -7.2143   | -0.5729 | 1.558   | -6.9899   | -0.5985 | 1.5718  |
| C | -6.3061   | -0.6191 | 0.3095  | -5.7876   | -0.6494 | 0.612   |
| C | -5.3966   | -1.8582 | 0.4111  | -5.1788   | -2.0609 | 0.6273  |
| C | -6.1695   | -3.1383 | 0.6118  | -6.201    | -3.1264 | 0.3089  |
| C | -5.4666   | 0.6859  | 0.1286  | -4.7129   | 0.4519  | 0.8598  |
| C | -4.6307   | 0.6544  | -1.1222 | -3.9381   | 0.3612  | 2.1377  |
| C | -4.8929   | 1.3546  | -2.2312 | -4.0144   | 1.2557  | 3.1299  |
| C | -6.0595   | 2.2305  | -2.2951 | -4.9137   | 2.4041  | 3.0313  |
| C | -6.8239   | 2.515   | -1.152  | -5.5947   | 2.7059  | 1.8408  |
| C | -6.3845   | 1.9388  | 0.1534  | -5.3325   | 1.8547  | 0.646   |
| C | -6.3977   | 2.8249  | -3.5177 | -5.0813   | 3.2333  | 4.1472  |
| C | -7.4877   | 3.6848  | -3.5987 | -5.9187   | 4.3417  | 4.0759  |
| C | -8.2653   | 3.9601  | -2.4805 | -6.609    | 4.6435  | 2.908   |
| C | -7.933    | 3.3691  | -1.2586 | -6.4474   | 3.8199  | 1.7916  |
| O | -8.7387   | 3.6071  | -0.1808 | -7.1666   | 4.0989  | 0.6639  |
| O | -6.7447   | 2.4367  | 1.2211  | -5.5368   | 2.261   | -0.4994 |
| O | -6.4274   | -0.3291 | 2.7208  | -6.5677   | -0.7468 | 2.9213  |
| O | -5.7298   | -4.2247 | 0.2342  | -5.8811   | -4.2031 | -0.1969 |
| O | -7.7491   | -5.5086 | 1.1791  | -8.2822   | -5.1157 | -0.0873 |
| H | -6.9591   | -0.7431 | -0.5677 | -6.1806   | -0.4955 | -0.4061 |
| O | -4.5208   | 0.8082  | 1.1928  | -3.7093   | 0.3067  | -0.1685 |
| O | -7.7636   | 4.2377  | -4.8138 | -6.0385   | 5.1116  | 5.1945  |
| H | -9.9399   | -5.1579 | 2.4409  | -10.6303  | -4.5022 | 0.6989  |
| H | -10.8526  | -2.9901 | 3.232   | -11.3192  | -2.3661 | 1.7562  |
| H | -9.6146   | -0.8951 | 2.8181  | -9.6621   | -0.5747 | 2.1326  |
| H | -7.9396   | 0.2413  | 1.4546  | -7.4862   | 0.3743  | 1.4811  |
| H | -4.8321   | -1.9792 | -0.5201 | -4.3926   | -2.1335 | -0.133  |
| H | -4.6784   | -1.7741 | 1.2345  | -4.7392   | -2.3087 | 1.5993  |
| H | -3.7405   | 0.0291  | -1.1013 | -3.2651   | -0.4854 | 2.2471  |
| H | -4.2385   | 1.2864  | -3.0958 | -3.4237   | 1.1273  | 4.0319  |
| H | -5.8133   | 2.6299  | -4.4144 | -4.5603   | 3.0249  | 5.079   |
| H | -9.1275   | 4.6136  | -2.5583 | -7.2739   | 5.4996  | 2.8685  |
| H | -9.2182   | 4.4423  | -0.3052 | -7.4573   | 5.0253  | 0.6732  |
| H | -7.0221   | -0.3704 | 3.492   | -7.2795   | -1.1694 | 3.4334  |
| H | -6.8781   | -5.3956 | 0.7342  | -7.3205   | -5.1256 | -0.2984 |
| H | -5.0529   | 0.8186  | 2.0181  | -3.8488   | 1.041   | -0.8007 |
| H | -8.5218   | 4.8397  | -4.7323 | -6.6322   | 5.8587  | 5.0126  |

**Table S4.** The results of the DP4<sup>+</sup> analysis of **2**

|    | A          | B    | C            | D        | E         | F        | G                 | H        |
|----|------------|------|--------------|----------|-----------|----------|-------------------|----------|
| 1  | Functional |      | Solvent?     |          | Basis Set |          | Type of Data      |          |
| 2  | MPV1P      | 91   | PCI          |          | 6-31G(d)  |          | Shielding Tensors |          |
| 3  |            |      |              |          |           |          |                   |          |
| 12 |            |      | DP4+         | 3.13%    | 96.87%    | -        | -                 | -        |
| 14 | Nuclei     | sp2? | Experimental | Isomer 1 | Isomer 2  | Isomer 3 | Isomer 4          | Isomer 5 |
| 15 | C          |      | 205          | -7.7     | -8.0      |          |                   |          |
| 16 | C          |      | 33.2         | 159.6    | 160.2     |          |                   |          |
| 17 | C          |      | 48.8         | 147.2    | 139.7     |          |                   |          |
| 18 | C          |      | 65.7         | 124.3    | 125.2     |          |                   |          |
| 19 | C          | x    | 146          | 53.3     | 51.2      |          |                   |          |
| 20 | C          | x    | 119.5        | 80.2     | 80.7      |          |                   |          |
| 21 | C          | x    | 137.2        | 58.4     | 59.8      |          |                   |          |
| 22 | C          | x    | 117          | 79.5     | 79.8      |          |                   |          |
| 23 | C          | x    | 161.4        | 35.4     | 34.7      |          |                   |          |
| 24 | C          | x    | 114.7        | 82.5     | 82.8      |          |                   |          |
| 25 | C          | x    | 203.4        | -3.7     | -3.5      |          |                   |          |
| 26 | C          |      | 73.6         | 112.6    | 117.6     |          |                   |          |
| 27 | C          | x    | 136.8        | 59.7     | 61.3      |          |                   |          |
| 28 | C          | x    | 125.3        | 70.7     | 68.4      |          |                   |          |
| 29 | C          | x    | 139.6        | 55.6     | 52.8      |          |                   |          |
| 30 | C          | x    | 107.9        | 90.7     | 90.1      |          |                   |          |
| 31 | C          | x    | 166.2        | 36.4     | 35.5      |          |                   |          |
| 32 | C          | x    | 101.5        | 96.9     | 97.7      |          |                   |          |
| 33 | C          | x    | 164.8        | 40.1     | 38.8      |          |                   |          |
| 34 | C          | x    | 106.7        | 88.0     | 88.0      |          |                   |          |
